# Supplementary material for: Assessing DNA methylation in the developing human intestinal epithelium: potential link to inflammatory bowel disease
Source: PubMed Central journal article supplement — Mucosal Immunol. 2015 Sep 16;9(3):647–58. doi: 10.1038/mi.2015.88 (PMC4854977; doi:10.1038/mi.2015.88), 2015-09-16
Supplement: mi201588x1.pdf [file mi201588x1.pdf]

## **Supplementary Methods**

### ***Purification of intestinal epithelial cells***

Samples were washed three times in Hank's Balanced Salt Solution (HBSS), followed by enzyme digestion using a mix of liberase and hyaluronidase in HBSS for 45 min at 37 °C. The cell suspension was passed through a 40 µM sieve, spun down at 1500 rpm at 4 °C for 7 min and re-suspended in phosphate-buffered saline (PBS) containing 10 % bovine serum albumin (BSA) and 100 IU/ml DNase. Cells were then stained with anti-CD326 magnetic microbeads and Fc-Receptor block for 30 min at 4 °C. A magnetic-associated, automated cell separation system (MACS, Miltenyi Biotec) was used to positively select for CD326+ cells. Sorted cells were re-suspended in RLT Plus lysis buffer (Qiagen) supplemented with 1 % β-Mercaptoethanol, passed through a Qiagen shredder column and stored at -80 °C until further processing.

T-cell contamination was assessed by flow cytometry with BD LSRFortessa (BD Bioscience) using FITC anti-human TCR α/β (BioLegend) with additional detection of dead cells by Zombie Aqua Fixable Viability Kit (BioLegend).

### ***Bioinformatic analyses***

DNA methylation data analyses: Raw Illumina Infinium HumanMethylation450 BeadChip data (i.e. IDAT files) were imported into R software for statistical analysis and the Bioconductor™ packages *minfi*<sup>1</sup> (and the annotation databases *IlluminaHumanMethylation450kmanifest*)<sup>2</sup> and *limma* were used for normalization and the majority of downstream analysis including generation of multidimensional scaling (MDS) plots and hierarchical clustering analysis.

Imported IDAT files were background corrected and SWAN-corrected<sup>3</sup> (subset-quantile-within array-normalization). Probes located on X and Y-chromosomes and probes with failed detection p-value (i.e.  $p > .001$ ) were excluded. M-values (defined as the log<sub>2</sub> ratio of

methylated probe intensity to the unmethylated probe intensity) were used for hierarchical clustering (ie. Euclidian distance of M-values with “ward” clustering method) and differential methylation analysis (as outlined below).

Distribution of unmethylated, partially and fully methylated probes was assessed using the *lumi*<sup>4</sup> package as described previously<sup>5</sup>. This function calls the methylation status of each probe as either “unmethylated,” “marginal” (named as “partially methylated”) or “methylated.” Differential methylated positions (DMPs) were calculated on M-values using *limma*<sup>6</sup> by fitting a linear model for each gene, computing estimated coefficients, standard errors for the contrast “Paediatric-Foetal” or “IBD-Control” and log-odds of differential expression by empirical Bayes moderation of the standard errors. Significantly different methylation positions were filtered out if the FDR-adjusted p-value < .01 and contrast log2 fold change greater than  $\pm 1.5$ .

DMPs were numerically grouped as differentially methylated or non-differentially methylated and ran in the *DMRfinder*<sup>7</sup> grouping  $\geq 3$  differentially methylated positions with an interposition distance of <1kb and a maximum mismatch of 3 non-differentially methylated positions. DMRs were then converted into a RangedData object and annotated using the *ChIPpeakanno* Bioconductor package<sup>8</sup> to the gene with nearest transcription start site (TSS).

Identification of rDMRs: Following identification and annotation of significantly differentially methylated regions (DMRs) and differentially expressed transcripts, rDMRs were defined as the overlap of both groups according to their unique gene symbol annotation (according to Ensembl database).

The significance of overlapping DMPs derived from the comparison between foetal and paediatric as well as IBD versus control datasets was calculated using a hypergeometric test

Gene expression data analyses: Raw Affymetrix data (i.e. CEL) files were read into R using the *affy*<sup>9</sup> Bioconductor package. Data were normalized using the variance-stabilizing normalization algorithm, while the expression signal from probe sets representing exons was

summarized using robust multi-array analysis. These exon-level probe sets were mapped to known transcripts using *hugene10sttranscriptcluster.db*<sup>10</sup>. Differentially expressed genes were identified with *limma*<sup>6</sup> in the same manner as for DMPs and the same significance levels for the contrast paediatric versus foetal (FDR adjusted  $P < .01$  and log2 fold-change  $> \pm 1.5$ ).

### Gene Expression primers

| Target | Forward primer [5'-3'] | Reverse primer [5'-3'] |
|--------|------------------------|------------------------|
| GAPDH  | AGGTCGGAGTCAACGGATTT   | TGGAAGATGGTGATGGGATTT  |
| PIGR   | CTGAGGAACAAGGTGGAAGC   | CAAATTCCTGGAGTTCTCG    |
| MUC2   | GATTCGAAGTGAAGAGCAAG   | CACTTGGAGGAATAAACTGG   |
| TLR3   | CCACACACTTCCCTGATGAA   | TGCAGTCAGCAACTTCATGG   |
| IL6R   | CTGGAAACTATTCATGCTACC  | GACTGTTCTGAAACTTCCTC   |
| TET1   | GAAAGAAGAGGGCTGCGATG   | TGCACGGTCTCAGTGTTACT   |
| SLC5A1 | ATCTATATTAAGGCTGGGGTG  | TCTTGGTGAAAATGTAGAGC   |

### Pyrosequencing primers

GB=gene body, PR=promoter, [btn]=biotinylated

| Name       | Forward primer [5-3]               | Reverse primer [5-3]                     | Sequencing primer            |
|------------|------------------------------------|------------------------------------------|------------------------------|
| IL6R       | GTTTGAGAGGAGTAGTTGGGTAGAA          | [btn]-ACCCATTACCCACTAAAATCAACC           | GTTGGGTAGAAAGATTGT           |
| MUC2       | GTTTTTTTGGTAGGGGTTATATATGAG        | [btn]-AAACCTATTTCCCTAACTAACCTACTAC       | GGAGAGTAGATTTTGGGG           |
| PIGR<br>GB | GATTTATGTTAGTTGTTGGAGATA<br>TAAAGT | [btn]-TTAAAAAATTA AACCTAACAAACACAC<br>CT | ATTGTTTTTTAGTATTGT<br>ATAGG  |
| PIGR<br>PR | AGATAGGGAAGGAGGTGTTA               | [btn]-TACCAAACCCCTTTTACCAAT              | ATTTTAGTTTAGTAGGTT<br>AGTAT  |
| SGLT1      | TGGGAGTATAGTGGGTTTTTG              | [btn]-AAAAAACACCCCACTAACTATTAAC          | GGTATTATTTTTGGTTG<br>GT      |
| TET1       | AGATTTTGGAGAGAGAATAGGAT<br>TAGGTA  | [btn]-ATACTCAAATAACTATTACCCTTACT         | GGAGAGAGAATAGGATT<br>AGGTATA |
| TLR3<br>GB | ATTTTTTTTATTTATTGTTTGGGG<br>GTAT   | [btn]-ACACAAAAATTCACCCAATACTACA          | TTTTTTGAGAGTTTAGGT<br>AG     |
| TLR3<br>PR | AGTTAATTTGAATTTTTTGGGTA<br>TATTGA  | [btn]-TAAAAACCAATCCCACTCCTACT            | AATTTTTTGGGTATATT<br>GATT    |

### Cloning primers

| Target | Forward primer [5'-3']   | Reverse primer [5'-3']  | Restriction pair |
|--------|--------------------------|-------------------------|------------------|
| PIGR   | GAAGATCTGGCTTCACTTTTGTG  | CCCAAGCTTTTCTCTCCCGTTGA | BglII, HindIII   |
| MUC2   | GAAGATCTCCACCATGAGTCAG   | CCCAAGCTTGTGTCTGCTCTCTC | BglII, HindIII   |
| TLR3   | AAAACCTGCAGAACCACTCACCTC | CATGCCATGGGGATGACTGCTAG | PstI, NcoI       |

## Antibodies used for Immunofluorescence

| Host   | Antigen    | Supplier                  | Product number | Dilution |
|--------|------------|---------------------------|----------------|----------|
| rabbit | MUC2       | abcam                     | ab134119       | 1/200    |
| rabbit | TLR3       | abcam                     | ab62566        | 1/500    |
| rabbit | PIGR       | abcam                     | ab96196        | 1/200    |
| goat   | rabbit IgG | Life Technologies         | R6394          | 1/1000   |
| donkey | goat IgG   | SantaCruz Biotechnologies | sc-2024        | 1/1000   |

## Details of paediatric control and IBD samples

| Patient# | Gender | Disease | Disease | Age | Segment | Macroscopic Inflammation score | Histological Inflammation score |
|----------|--------|---------|---------|-----|---------|--------------------------------|---------------------------------|
| 1        | Male   | Control | Control | 13  | AC      | 0                              | 0                               |
| 1        | Male   | Control | Control | 13  | SC      | 0                              | 0                               |
| 7        | Female | Control | Control | 14  | AC      | 0                              | 0                               |
| 7        | Female | Control | Control | 14  | SC      | 0                              | 0                               |
| 23       | Male   | Control | Control | 14  | AC      | 0                              | 0                               |
| 23       | Male   | Control | Control | 14  | SC      | 0                              | 0                               |
| 39       | Male   | Control | Control | 14  | AC      | 0                              | 0                               |
| 39       | Male   | Control | Control | 14  | SC      | 0                              | 0                               |
| 56       | Female | Control | Control | 13  | AC      | 0                              | 0                               |
| 56       | Female | Control | Control | 13  | SC      | 0                              | 0                               |
| 28       | Female | IBD     | UC      | 14  | AC      | 2                              | 2                               |
| 28       | Female | IBD     | UC      | 14  | SC      | 0                              | 0                               |
| 6        | Male   | IBD     | UC      | 12  | AC      | 0                              | 1                               |
| 6        | Male   | IBD     | UC      | 12  | SC      | 2                              | 3                               |
| 24       | Female | IBD     | UC      | 14  | AC      | 0                              | 2                               |
| 24       | Female | IBD     | UC      | 14  | SC      | 0                              | 2                               |
| 47       | Male   | IBD     | UC      | 13  | AC      | 1                              | 2                               |
| 47       | Male   | IBD     | UC      | 13  | SC      | 1                              | 2                               |
| 40       | Male   | IBD     | UC      | 14  | AC      | 1                              | 1                               |
| 40       | Male   | IBD     | UC      | 14  | SC      | 2                              | 1                               |
| 35       | Male   | IBD     | CD      | 13  | AC      | 2                              | 2                               |
| 35       | Male   | IBD     | CD      | 13  | SC      | 1                              | 0                               |
| 13       | Male   | IBD     | CD      | 13  | AC      | 0                              | 0                               |
| 13       | Male   | IBD     | CD      | 13  | SC      | 0                              | 0                               |
| 26       | Male   | IBD     | CD      | 13  | AC      | 2                              | 1                               |
| 26       | Male   | IBD     | CD      | 13  | SC      | 0                              | 1                               |
| 34       | Female | IBD     | CD      | 13  | AC      | 0                              | 0                               |
| 34       | Female | IBD     | CD      | 13  | SC      | 2                              | 2                               |
| 41       | Female | IBD     | CD      | 13  | AC      | 2                              | 1                               |
| 41       | Female | IBD     | CD      | 13  | SC      | 1                              | 1                               |

IBD=Inflammatory Bowel Disease, UC=Ulcerative Colitis, CD=Crohn's Disease, AC=Ascending Colon, SC=Sigmoid Colon

## Supplementary Methods: References

1. Aryee MJ, Jaffe AE, Corrada-Bravo H, et al. Minfi: a flexible and comprehensive Bioconductor package for the analysis of Infinium DNA methylation microarrays. *Bioinformatics (Oxford, England)* 2014;30:1363-9.
2. Hansen K, Aryee M. *IlluminaHumanMethylation450kmanifest*.
3. Maksimovic J, Gordon L, Oshlack A. SWAN: Subset-quantile within array normalization for illumina infinium HumanMethylation450 BeadChips. *Genome biology* 2012;13:R44-R44.
4. Du P, Kibbe WA, Lin SM. lumi: a pipeline for processing Illumina microarray. *Bioinformatics (Oxford, England)* 2008;24:1547-8.
5. Zilbauer M, Rayner TF, Clark C, et al. Genome-wide methylation analyses of primary human leukocyte subsets identifies functionally important cell-type-specific hypomethylated regions. *Blood* 2013;122:e52-60.
6. Smyth G. *limma*, 2005:pp. 397-420.
7. Sliker RC, Bos SD, Goeman JJ, et al. Identification and systematic annotation of tissue-specific differentially methylated regions using the Illumina 450k array. *Epigenetics Chromatin* 2013;6:26.
8. Zhu LJ, Gazin C, Lawson ND, et al. CHIPpeakAnno: a Bioconductor package to annotate CHIP-seq and CHIP-chip data. *BMC bioinformatics* 2010;11:237-237.
9. Gautier L, Cope L, Bolstad BM, et al. affy--analysis of Affymetrix GeneChip data at the probe level. *Bioinformatics (Oxford, England)* 2004;20:307-15.
10. MacDonald J. *hugene10sttranscriptcluster.db*.

**Supplementary Table 1:** Genomic location of identified regulatory Differentially Methylated Regions (rDMRs) mapped on the reference human genome (hg19). DMRs were annotated using Bioconductor package *ChIPpeakAnno*, providing start and end site, chromosomal locations and attributed gene (feature) based on nearest transcription start site.

| DMR start | end       | width     | strand | feature | start position  | end position | inside Feature | distance to feature (nearest TSS) | symbol | genename  |                                                                                             |
|-----------|-----------|-----------|--------|---------|-----------------|--------------|----------------|-----------------------------------|--------|-----------|---------------------------------------------------------------------------------------------|
| 1         | 19599516  | 19600817  | 1302   | -       | ENSG00000211454 | 19592478     | 19600688       | overlapStart                      | 1172   | AKR7L     | aldo-keto reductase family 7-like                                                           |
| 1         | 27189298  | 27190330  | 1033   | +       | ENSG00000175793 | 27189653     | 27190947       | overlapStart                      | -355   | SFN       | stratifin                                                                                   |
| 1         | 31845904  | 31846110  | 207    | -       | ENSG00000121769 | 31838472     | 31849697       | inside                            | 3793   | FABP3     | fatty acid binding protein 3, muscle and heart (mammary-derived growth inhibitor)           |
| 1         | 38022359  | 38022718  | 360    | +       | ENSG00000163879 | 38022520     | 38032458       | overlapStart                      | -161   | DNALI1    | dynein, axonemal, light intermediate chain 1                                                |
| 1         | 47655599  | 47656423  | 825    | -       | ENSG00000162366 | 47649265     | 47656716       | inside                            | 1117   | PDZK1P1   | PDZK1 interacting protein 1                                                                 |
| 1         | 64937345  | 64937528  | 184    | +       | ENSG00000158966 | 64936428     | 65158741       | inside                            | 917    | CACHD1    | cache domain containing 1                                                                   |
| 1         | 79085250  | 79086197  | 948    | +       | ENSG00000137959 | 79085607     | 79108484       | overlapStart                      | -357   | IFI44L    | interferon-induced protein 44-like                                                          |
| 1         | 79472282  | 79472452  | 171    | -       | ENSG00000162618 | 79355449     | 79472452       | inside                            | 213    | ELTD1     | EGF, latrophilin and seven transmembrane domain containing 1                                |
| 1         | 85512957  | 85513191  | 235    | -       | ENSG00000055732 | 85483765     | 85514182       | inside                            | 1225   | MCOLN3    | mucoilin 3                                                                                  |
| 1         | 86047227  | 86047433  | 207    | +       | ENSG00000142871 | 86046444     | 86049645       | inside                            | 783    | CYR61     | cysteine-rich, angiogenic inducer, 61                                                       |
| 1         | 89664338  | 89664782  | 445    | -       | ENSG00000162654 | 89646831     | 89664615       | overlapStart                      | 277    | GBP4      | guanylate binding protein 4                                                                 |
| 1         | 110254662 | 110255096 | 435    | +       | ENSG00000134201 | 110254877    | 110260888      | overlapStart                      | -215   | GSTM5     | glutathione S-transferase mu 5                                                              |
| 1         | 114429815 | 114430903 | 1089   | -       | ENSG00000188761 | 114420790    | 114430203      | overlapStart                      | 388    | BCL2L15   | BCL2-like 15                                                                                |
| 1         | 114521775 | 114522185 | 411    | +       | ENSG00000167774 | 114522063    | 114524876      | overlapStart                      | -288   | OLFML3    | olfactomedin-like 3                                                                         |
| 1         | 117529619 | 117530009 | 391    | +       | ENSG00000134256 | 117544382    | 117579167      | upstream                          | -14763 | CD101     | CD101 molecule                                                                              |
| 1         | 145714010 | 145714143 | 134    | -       | ENSG00000117281 | 145695798    | 145715614      | inside                            | 1604   | CD160     | CD160 molecule                                                                              |
| 1         | 151343840 | 151346400 | 2561   | -       | ENSG00000143416 | 151336778    | 151345209      | overlapStart                      | 1369   | SELENBP1  | selenium binding protein 1                                                                  |
| 1         | 151804260 | 151805634 | 1375   | -       | ENSG00000143365 | 151778547    | 151804348      | overlapStart                      | 88     | RORC      | RAR-related orphan receptor C                                                               |
| 1         | 154377091 | 154377429 | 339    | +       | ENSG00000160712 | 154377669    | 154441926      | upstream                          | -578   | IL6R      | interleukin 6 receptor                                                                      |
| 1         | 156261200 | 156261403 | 204    | -       | ENSG00000198715 | 156248142    | 156265463      | inside                            | 4263   | C1orf85   | chromosome 1 open reading frame 85                                                          |
| 1         | 160854954 | 160855148 | 195    | -       | ENSG00000179914 | 160846329    | 160854960      | overlapStart                      | 6      | ITLN1     | intelectin 1 (galactofuranose binding)                                                      |
| 1         | 161193393 | 161195180 | 1788   | -       | ENSG00000158874 | 161192082    | 161193421      | overlapStart                      | 28     | APOA2     | apolipoprotein A-II                                                                         |
| 1         | 207119784 | 207120628 | 845    | -       | ENSG00000162896 | 207101863    | 207119811      | overlapStart                      | 27     | PIGR      | polymeric immunoglobulin receptor                                                           |
| 1         | 217311993 | 217312478 | 486    | -       | ENSG00000196482 | 216676588    | 217311097      | upstream                          | -896   | ESRRG     | estrogen-related receptor gamma                                                             |
| 1         | 217313699 | 217314284 | 586    | -       | ENSG00000196482 | 216676588    | 217311097      | upstream                          | -2602  | ESRRG     | estrogen-related receptor gamma                                                             |
| 2         | 1690592   | 1691165   | 574    | -       | ENSG00000130508 | 1635659      | 1748624        | inside                            | 58032  | PXDN      | peroxidase homolog (Drosophila)                                                             |
| 2         | 61371880  | 61372256  | 377    | -       | ENSG00000212978 | 61368913     | 61372104       | overlapStart                      | 224    | LOC339803 | uncharacterized LOC339803                                                                   |
| 2         | 79347474  | 79347699  | 226    | +       | ENSG00000115386 | 79347488     | 79350545       | overlapStart                      | -14    | REG1A     | regenerating islet-derived 1 alpha                                                          |
| 2         | 85361959  | 85362480  | 522    | +       | ENSG00000152284 | 85360533     | 85537511       | inside                            | 1426   | TCF7L1    | transcription factor 7-like 1 (T-cell specific, HMG-box)                                    |
| 2         | 87018944  | 87018966  | 23     | -       | ENSG00000153563 | 87011729     | 87035519       | inside                            | 16575  | CD8A      | CD8a molecule                                                                               |
| 2         | 102608155 | 102608349 | 195    | +       | ENSG00000115590 | 102608306    | 102645006      | overlapStart                      | -151   | IL1R2     | interleukin 1 receptor, type II                                                             |
| 2         | 103239106 | 103240272 | 1167   | +       | ENSG00000115616 | 103236166    | 103237777      | inside                            | 2940   | SLC9A2    | solute carrier family 9, subfamily A (NHE2, cation proton antiporter 2), member 2           |
| 2         | 108993737 | 108994528 | 792    | +       | ENSG00000198075 | 108994367    | 109006667      | overlapStart                      | -630   | SULT1C4   | sulfotransferase family, cytosolic, 1C, member 4                                            |
| 2         | 186603398 | 186603639 | 242    | +       | ENSG00000188738 | 186603622    | 186698017      | overlapStart                      | -224   | FSIP2     | fibrous sheath interacting protein 2                                                        |
| 2         | 190044504 | 190044983 | 480    | -       | ENSG00000204262 | 189896622    | 190044605      | overlapStart                      | 101    | COL5A2    | collagen, type V, alpha 2                                                                   |
| 2         | 198540518 | 198540621 | 104    | -       | ENSG00000162944 | 198435524    | 198540769      | inside                            | 251    | RFTN2     | raftin family member 2                                                                      |
| 2         | 202047246 | 202048100 | 855    | +       | ENSG00000003400 | 202047604    | 202094129      | overlapStart                      | -358   | CASP10    | caspace 10, apoptosis-related cysteine peptidase                                            |
| 2         | 206551364 | 206551844 | 481    | +       | ENSG00000118257 | 206546714    | 206662857      | inside                            | 4650   | NRP2      | neuropilin 2                                                                                |
| 2         | 216299448 | 216299856 | 409    | -       | ENSG00000115414 | 216225163    | 216300895      | inside                            | 1447   | FN1       | fibronectin 1                                                                               |
| 2         | 233877857 | 233878714 | 858    | -       | ENSG00000066248 | 233743396    | 233877982      | overlapStart                      | 125    | NGF       | neuronal guanine nucleotide exchange factor                                                 |
| 2         | 234526077 | 234526295 | 219    | +       | ENSG00000242366 | 234526291    | 234681956      | overlapStart                      | -214   | UGT1A1    | UDP glucuronosyltransferase 1 family, polypeptide A1                                        |
| 2         | 242710939 | 242711046 | 108    | +       | ENSG00000154252 | 242716240    | 242750403      | upstream                          | -5301  | GAL3ST2   | galactose-3-O-sulfotransferase 2                                                            |
| 2         | 242715549 | 242716559 | 1011   | +       | ENSG00000154252 | 242716240    | 242750403      | overlapStart                      | -691   | GAL3ST2   | galactose-3-O-sulfotransferase 2                                                            |
| 3         | 49907468  | 49907692  | 225    | -       | ENSG00000164076 | 49895421     | 49907655       | overlapStart                      | 187    | CAMKV     | CaM kinase-like vesicle-associated                                                          |
| 3         | 52568323  | 52569169  | 847    | -       | ENSG00000168268 | 52558386     | 52569070       | overlapStart                      | 747    | NTSDC2    | 5'-nucleotidase domain containing 2                                                         |
| 3         | 58652346  | 58653593  | 1248   | -       | ENSG00000198643 | 58619673     | 58652575       | overlapStart                      | 229    | FAM3D     | family with sequence similarity 3, member D                                                 |
| 3         | 108475765 | 108476878 | 1114   | -       | ENSG00000163515 | 108462271    | 108476231      | overlapStart                      | 466    | RETNLB    | resistin like beta                                                                          |
| 3         | 118892215 | 118892330 | 116    | +       | ENSG00000114638 | 118892364    | 118924000      | upstream                          | -149   | UPK1B     | uroplakin 1B                                                                                |
| 3         | 119422161 | 119422359 | 199    | +       | ENSG00000183833 | 119421869    | 119485949      | inside                            | 292    | MAATS1    | MYCBP-associated, testis expressed 1                                                        |
| 3         | 139257113 | 139257907 | 195    | -       | ENSG00000114115 | 139236276    | 139258671      | inside                            | 958    | RBP1      | retinol binding protein 1, cellular                                                         |
| 3         | 164911744 | 164912664 | 921    | -       | ENSG00000121871 | 164904508    | 164914897      | inside                            | 3153   | SLITRK3   | SLIT and NTRK-like family, member 3                                                         |
| 3         | 187009486 | 187010344 | 859    | -       | ENSG00000127241 | 186935942    | 187009810      | overlapStart                      | 324    | MASP1     | mannan-binding lectin serine peptidase 1 (C4/C2 activating component of Ra-reactive factor) |
| 4         | 15480643  | 15481269  | 627    | +       | ENSG00000048342 | 15471489     | 15603180       | inside                            | 9154   | CC2D2A    | coiled-coil and C2 domain containing 2A                                                     |
| 4         | 40752838  | 40753247  | 410    | +       | ENSG00000179299 | 40751914     | 40812002       | inside                            | 924    | NSUN7     | NOP2/Sun domain family, member 7                                                            |
| 4         | 41646293  | 41646672  | 380    | -       | ENSG00000109132 | 41746099     | 41750987       | downstream                        | 104694 | PHOX2B    | paired-like homeobox 2b                                                                     |
| 4         | 41746947  | 41749443  | 2497   | -       | ENSG00000109132 | 41746099     | 41750987       | inside                            | 4040   | PHOX2B    | paired-like homeobox 2b                                                                     |
| 4         | 100736658 | 100738011 | 1354   | +       | ENSG00000070190 | 100737981    | 100791344      | overlapStart                      | -1323  | DAPP1     | dual adaptor of phosphotyrosine and 3-phosphoinositides                                     |
| 4         | 121991345 | 121991672 | 328    | -       | ENSG00000173376 | 121956768    | 121993569      | inside                            | 2224   | NDNF      | neuron-derived neurotrophic factor                                                          |
| 4         | 151500192 | 151501739 | 1548   | +       | ENSG00000181541 | 151503077    | 151505843      | upstream                          | -2885  | MAB21L2   | mab-21-like 2 (C. elegans)                                                                  |
| 4         | 151502935 | 151505467 | 2533   | +       | ENSG00000181541 | 151503077    | 151505843      | overlapStart                      | -142   | MAB21L2   | mab-21-like 2 (C. elegans)                                                                  |
| 4         | 155533784 | 155534149 | 366    | -       | ENSG00000171557 | 155525286    | 155534119      | overlapStart                      | 335    | FGG       | fibronogen gamma chain                                                                      |
| 4         | 156298166 | 156298332 | 167    | -       | ENSG00000164114 | 156263810    | 156298122      | upstream                          | -44    | MAP9      | microtubule-associated protein 9                                                            |
| 4         | 157996959 | 157997086 | 128    | +       | ENSG00000109738 | 157997277    | 158093242      | upstream                          | -318   | GLRB      | glycine receptor, beta                                                                      |
| 4         | 186990006 | 186990425 | 420    | +       | ENSG00000164342 | 186990309    | 187006250      | overlapStart                      | -303   | TLR3      | tol-like receptor 3                                                                         |
| 4         | 188916865 | 188918218 | 1354   | +       | ENSG00000179059 | 188916925    | 188926199      | overlapStart                      | -60    | ZFP42     | ZFP42 zinc finger protein                                                                   |
| 5         | 32712237  | 32713112  | 876    | +       | ENSG00000113389 | 32709513     | 32787252       | inside                            | 2724   | NPR3      | natriuretic peptide receptor 3                                                              |
| 5         | 40680670  | 40682333  | 1664   | +       | ENSG00000171522 | 40680033     | 40693837       | inside                            | 637    | PTGER4    | prostaglandin E receptor 4 (subtype EP4)                                                    |
| 5         | 43396953  | 43397572  | 620    | -       | ENSG00000151882 | 43376747     | 43412493       | inside                            | 15540  | CCL28     | chemokine (C-C motif) ligand 28                                                             |
| 5         | 43411929  | 43413879  | 1951   | -       | ENSG00000151882 | 43376747     | 43412493       | overlapStart                      | 564    | CCL28     | chemokine (C-C motif) ligand 28                                                             |
| 5         | 71014918  | 71015523  | 606    | +       | ENSG00000164326 | 71014994     | 71016875       | overlapStart                      | -76    | CARTPT    | CART prepropeptide                                                                          |
| 5         | 74162771  | 74162880  | 110    | -       | ENSG00000198780 | 74073399     | 74162663       | upstream                          | -108   | FAM169A   | family with sequence similarity 169, member A                                               |
| 5         | 127871927 | 127873106 | 1180   | -       | ENSG00000138829 | 127593601    | 127873735      | inside                            | 1808   | FBN2      | fibrillin 2                                                                                 |
| 5         | 127874466 | 127874825 | 360    | -       | ENSG00000138829 | 127593601    | 127873735      | upstream                          | -731   | FBN2      | fibrillin 2                                                                                 |

|    |           |           |      |   |                 |           |           |              |        |                 |                                                                           |
|----|-----------|-----------|------|---|-----------------|-----------|-----------|--------------|--------|-----------------|---------------------------------------------------------------------------|
| 5  | 149792390 | 149792840 | 451  | - | ENSG0000019582  | 149781206 | 149792332 | upstream     | -58    | <b>CD74</b>     | CD74 molecule, major histocompatibility complex, class II invariant chain |
| 5  | 150284416 | 150284600 | 185  | - | ENSG00000145908 | 150273961 | 150284540 | overlapStart | 124    | <b>ZNF300</b>   | zinc finger protein 300                                                   |
| 6  | 5994743   | 5995150   | 408  | - | ENSG00000124785 | 5998232   | 6007200   | downstream   | 12457  | <b>NRN1</b>     | neuritin 1                                                                |
| 6  | 6004686   | 6004897   | 212  | - | ENSG00000124785 | 5998232   | 6007200   | inside       | 2514   | <b>NRN1</b>     | neuritin 1                                                                |
| 6  | 6006398   | 6006770   | 373  | - | ENSG00000124785 | 5998232   | 6007200   | inside       | 802    | <b>NRN1</b>     | neuritin 1                                                                |
| 6  | 11044877  | 11044894  | 18   | - | ENSG00000197977 | 10980992  | 11044547  | upstream     | -330   | <b>ELOVL2</b>   | ELOVL fatty acid elongase 2                                               |
| 6  | 25218680  | 25218855  | 176  | - | ENSG00000168405 | 25081295  | 25218698  | overlapStart | 18     | <b>CMAHP</b>    | cytidine monophospho-N-acetylneuraminic acid hydroxylase, pseudogene      |
| 6  | 26440101  | 26440610  | 510  | + | ENSG00000111801 | 26440700  | 26453643  | upstream     | -599   | <b>BTN3A3</b>   | butyrophilin, subfamily 3, member A3                                      |
| 6  | 29527870  | 29528119  | 250  | - | ENSG00000213886 | 29523292  | 29527702  | upstream     | -168   | <b>UBD</b>      | ubiquitin D                                                               |
| 6  | 29690766  | 29690893  | 128  | + | ENSG00000204642 | 29690552  | 29706305  | inside       | 214    | <b>HLA-F</b>    | major histocompatibility complex, class I, F                              |
| 6  | 30079203  | 30079307  | 105  | - | ENSG00000204616 | 30070674  | 30080883  | inside       | 1680   | <b>TRIM31</b>   | tripartite motif containing 31                                            |
| 6  | 30080495  | 30081408  | 914  | - | ENSG00000204616 | 30070674  | 30080883  | overlapStart | 388    | <b>TRIM31</b>   | tripartite motif containing 31                                            |
| 6  | 30458586  | 30458730  | 145  | + | ENSG00000204592 | 30457231  | 30461982  | inside       | 1355   | <b>HLA-E</b>    | major histocompatibility complex, class I, E                              |
| 6  | 30459512  | 30460244  | 733  | + | ENSG00000204592 | 30457231  | 30461982  | inside       | 2281   | <b>HLA-E</b>    | major histocompatibility complex, class I, E                              |
| 6  | 31238245  | 31238751  | 507  | - | ENSG00000204525 | 31236526  | 31239907  | inside       | 1662   | <b>HLA-C</b>    | major histocompatibility complex, class I, C                              |
| 6  | 31239063  | 31239158  | 96   | - | ENSG00000204525 | 31236526  | 31239907  | inside       | 844    | <b>HLA-C</b>    | major histocompatibility complex, class I, C                              |
| 6  | 31466722  | 31466821  | 100  | + | ENSG00000204516 | 31465863  | 31478901  | inside       | 859    | <b>MICB</b>     | MHC class I polypeptide-related sequence B                                |
| 6  | 32407289  | 32407689  | 401  | + | ENSG00000204287 | 32407619  | 32412823  | overlapStart | -330   | <b>HLA-DRA</b>  | major histocompatibility complex, class II, DR alpha                      |
| 6  | 32798417  | 32798510  | 94   | - | ENSG00000204267 | 32781544  | 32806599  | inside       | 8182   | <b>TAP2</b>     | transporter 2, ATP-binding cassette, sub-family B (MDR/TAP)               |
| 6  | 32800429  | 32800541  | 113  | - | ENSG00000204267 | 32781544  | 32806599  | inside       | 6170   | <b>TAP2</b>     | transporter 2, ATP-binding cassette, sub-family B (MDR/TAP)               |
| 6  | 32812933  | 32813154  | 222  | - | ENSG00000204264 | 32808494  | 32812480  | upstream     | -453   | <b>PSMB8</b>    | proteasome (prosome, macropain) subunit, beta type, 8                     |
| 6  | 32819858  | 32820586  | 729  | - | ENSG00000168394 | 32812986  | 32821755  | inside       | 1897   | <b>TAP1</b>     | transporter 1, ATP-binding cassette, sub-family B (MDR/TAP)               |
| 6  | 32822346  | 32823116  | 771  | - | ENSG00000168394 | 32812986  | 32821755  | upstream     | -591   | <b>TAP1</b>     | transporter 1, ATP-binding cassette, sub-family B (MDR/TAP)               |
| 6  | 32825040  | 32825360  | 321  | - | ENSG00000168394 | 32812986  | 32821755  | upstream     | -3285  | <b>TAP1</b>     | transporter 1, ATP-binding cassette, sub-family B (MDR/TAP)               |
| 6  | 32828996  | 32829208  | 213  | - | ENSG00000168394 | 32812986  | 32821755  | upstream     | -7241  | <b>TAP1</b>     | transporter 1, ATP-binding cassette, sub-family B (MDR/TAP)               |
| 6  | 32920735  | 32921200  | 466  | - | ENSG00000242574 | 32902406  | 32920899  | overlapStart | 164    | <b>HLA-DMB</b>  | major histocompatibility complex, class II, DM beta                       |
| 6  | 32942710  | 32942808  | 99   | - | ENSG00000204257 | 32916390  | 32938493  | upstream     | -4217  | <b>HLA-DMA</b>  | major histocompatibility complex, class II, DM alpha                      |
| 6  | 32945234  | 32945423  | 190  | - | ENSG00000204257 | 32916390  | 32938493  | upstream     | -6741  | <b>HLA-DMA</b>  | major histocompatibility complex, class II, DM alpha                      |
| 6  | 33047944  | 33048919  | 976  | - | ENSG00000231389 | 33032346  | 33048552  | overlapStart | 608    | <b>HLA-DPA1</b> | major histocompatibility complex, class II, DP alpha 1                    |
| 6  | 33264834  | 33265133  | 300  | - | ENSG00000237441 | 33259431  | 33267101  | inside       | 2267   | <b>RGL2</b>     | ral guanine nucleotide dissociation stimulator-like 2                     |
| 6  | 33267989  | 33267996  | 8    | - | ENSG00000237441 | 33259431  | 33267101  | upstream     | -888   | <b>RGL2</b>     | ral guanine nucleotide dissociation stimulator-like 2                     |
| 6  | 34498918  | 34499504  | 587  | - | ENSG00000124664 | 34505579  | 34524091  | downstream   | 25173  | <b>SPDEF</b>    | SAM pointed domain containing ETS transcription factor                    |
| 6  | 52858459  | 52859107  | 649  | - | ENSG00000170899 | 52842751  | 52860176  | inside       | 1717   | <b>GSTA4</b>    | glutathione S-transferase alpha 4                                         |
| 7  | 1022471   | 1022675   | 205  | + | ENSG00000073067 | 1022835   | 1029276   | upstream     | -364   | <b>CYP2W1</b>   | cytochrome P450, family 2, subfamily W, polypeptide 1                     |
| 7  | 2551598   | 2551996   | 399  | + | ENSG00000106003 | 2552163   | 2568811   | upstream     | -565   | <b>LFNG</b>     | LFNG O-fucosylpeptide 3-beta-N-acetylglucosaminyltransferase              |
| 7  | 2557028   | 2557358   | 331  | + | ENSG00000106003 | 2552163   | 2568811   | inside       | 4865   | <b>LFNG</b>     | LFNG O-fucosylpeptide 3-beta-N-acetylglucosaminyltransferase              |
| 7  | 2564966   | 2566750   | 1785 | + | ENSG00000106003 | 2552163   | 2568811   | inside       | 12803  | <b>LFNG</b>     | LFNG O-fucosylpeptide 3-beta-N-acetylglucosaminyltransferase              |
| 7  | 5292696   | 5293333   | 638  | + | ENSG00000164638 | 5314000   | 5343696   | upstream     | -21304 | <b>SLC29A4</b>  | solute carrier family 29 (equilibrative nucleoside transporter), member 4 |
| 7  | 30950813  | 30951801  | 989  | + | ENSG00000240583 | 30951468  | 30965131  | overlapStart | -655   | <b>AQP1</b>     | aquaporin 1 (Colton blood group)                                          |
| 7  | 44580809  | 44581105  | 297  | - | ENSG0000015520  | 44552134  | 44580914  | overlapStart | 105    | <b>NPC1L1</b>   | NPC1-like 1                                                               |
| 7  | 48129797  | 48130197  | 401  | + | ENSG00000183696 | 48128225  | 48148330  | inside       | 1572   | <b>UPP1</b>     | uridine phosphorylase 1                                                   |
| 7  | 92747308  | 92747455  | 148  | - | ENSG00000205413 | 92728829  | 92747336  | overlapStart | 28     | <b>SAMD9</b>    | sterile alpha motif domain containing 9                                   |
| 7  | 99277394  | 99277978  | 585  | - | ENSG00000106258 | 99245817  | 99277619  | overlapStart | 225    | <b>CYP3A5</b>   | cytochrome P450, family 3, subfamily A, polypeptide 5                     |
| 7  | 102574445 | 102574504 | 60   | + | ENSG00000128606 | 102553438 | 102585396 | inside       | 21007  | <b>LRRC17</b>   | leucine rich repeat containing 17                                         |
| 7  | 134832221 | 134833299 | 1079 | + | ENSG00000146859 | 134832824 | 134850650 | overlapStart | -603   | <b>TMEM140</b>  | transmembrane protein 140                                                 |
| 7  | 150211761 | 150211939 | 179  | + | ENSG00000179144 | 150211918 | 150218161 | overlapStart | -157   | <b>GIMAP7</b>   | GTPase, IMAP family member 7                                              |
| 8  | 24771326  | 24773060  | 1735 | + | ENSG00000104722 | 24770525  | 24776606  | inside       | 801    | <b>NEFM</b>     | neurofilament, medium polypeptide                                         |
| 8  | 30300142  | 30300306  | 165  | + | ENSG00000157110 | 30241944  | 30429734  | inside       | 58198  | <b>RBPMS</b>    | RNA binding protein with multiple splicing                                |
| 8  | 41165699  | 41166738  | 1040 | - | ENSG00000104332 | 41119483  | 41166992  | inside       | 1293   | <b>SFRP1</b>    | secreted frizzled-related protein 1                                       |
| 8  | 80523320  | 80523413  | 94   | + | ENSG00000104435 | 80523361  | 80578313  | overlapStart | -41    | <b>STMN2</b>    | stathmin-like 2                                                           |
| 8  | 98289745  | 98290574  | 830  | - | ENSG00000180543 | 98285717  | 98290176  | overlapStart | 431    | <b>TSPYL5</b>   | TSPY-like 5                                                               |
| 8  | 145048235 | 145048767 | 533  | - | ENSG00000178209 | 144989321 | 145049543 | inside       | 1308   | <b>PLEC</b>     | plectin                                                                   |
| 8  | 145051668 | 145052304 | 637  | - | ENSG00000178209 | 144989321 | 145049543 | upstream     | -2125  | <b>PLEC</b>     | plectin                                                                   |
| 8  | 145727318 | 145728526 | 1209 | + | ENSG00000167701 | 145729465 | 145732554 | upstream     | -2147  | <b>GPT</b>      | glutamic-pyruvate transaminase (alanine aminotransferase)                 |
| 8  | 145729106 | 145729799 | 694  | + | ENSG00000167701 | 145729465 | 145732554 | overlapStart | -359   | <b>GPT</b>      | glutamic-pyruvate transaminase (alanine aminotransferase)                 |
| 9  | 112970404 | 112970590 | 187  | - | ENSG00000188959 | 112952328 | 112970469 | overlapStart | 65     | <b>C9orf152</b> | chromosome 9 open reading frame 152                                       |
| 9  | 120466493 | 120466837 | 345  | + | ENSG00000136869 | 120466610 | 120479149 | overlapStart | -117   | <b>TLR4</b>     | toll-like receptor 4                                                      |
| 10 | 70319645  | 70319783  | 139  | + | ENSG00000138336 | 70320413  | 70454239  | upstream     | -768   | <b>TET1</b>     | tet methylcytosine dioxygenase 1                                          |
| 10 | 70321554  | 70322874  | 1321 | + | ENSG00000138336 | 70320413  | 70454239  | inside       | 1141   | <b>TET1</b>     | tet methylcytosine dioxygenase 1                                          |
| 10 | 85932296  | 85933798  | 1503 | + | ENSG00000188373 | 85933494  | 85945050  | overlapStart | -1198  | <b>C10orf99</b> | chromosome 10 open reading frame 99                                       |
| 10 | 85956635  | 85958834  | 2200 | + | ENSG00000148600 | 85954410  | 85979377  | inside       | 2225   | <b>CDHR1</b>    | cadherin-related family member 1                                          |
| 10 | 90611782  | 90613015  | 1234 | - | ENSG00000152766 | 90581889  | 90611575  | upstream     | -207   | <b>ANKRD22</b>  | ankyrin repeat domain 22                                                  |
| 10 | 90749920  | 90750176  | 257  | + | ENSG00000026103 | 90749226  | 90775542  | inside       | 694    | <b>FAS</b>      | Fas cell surface death receptor                                           |
| 10 | 91061115  | 91061583  | 469  | + | ENSG00000119922 | 91061712  | 91069033  | upstream     | -597   | <b>IFIT2</b>    | interferon-induced protein with tetratricopeptide repeats 2               |

|    |           |           |      |   |                  |           |           |              |        |                 |                                                                                                        |
|----|-----------|-----------|------|---|------------------|-----------|-----------|--------------|--------|-----------------|--------------------------------------------------------------------------------------------------------|
| 10 | 114134550 | 114136073 | 1524 | + | ENSG00000197142  | 114133776 | 114188138 | inside       | 774    | <b>ACSL5</b>    | acyl-CoA synthetase long-chain family member 5                                                         |
| 10 | 133793477 | 133794454 | 978  | - | ENSG00000176171  | 133781578 | 133795435 | inside       | 1958   | <b>BNIP3</b>    | BCL2/adenovirus E1B 19kDa interacting protein 3                                                        |
| 11 | 1060659   | 1060710   | 52   | + | ENSG00000198788  | 1074875   | 1104416   | upstream     | -14216 | <b>MUC2</b>     | mucin 2, oligomeric mucus/gel-forming                                                                  |
| 11 | 1073496   | 1073641   | 146  | + | ENSG00000198788  | 1074875   | 1104416   | upstream     | -1379  | <b>MUC2</b>     | mucin 2, oligomeric mucus/gel-forming                                                                  |
| 11 | 2170831   | 2171026   | 196  | - | ENSG00000167244  | 2150342   | 2170833   | overlapStart | 2      | <b>IGF2</b>     | insulin-like growth factor 2 (somatomedin A)                                                           |
| 11 | 2481206   | 2481965   | 760  | + | ENSG00000053918  | 2466221   | 2870221   | inside       | 14985  | <b>KCNQ1</b>    | potassium voltage-gated channel, KQT-like subfamily, member 1                                          |
| 11 | 2482223   | 2482401   | 179  | + | ENSG00000053918  | 2466221   | 2870221   | inside       | 16002  | <b>KCNQ1</b>    | potassium voltage-gated channel, KQT-like subfamily, member 1                                          |
| 11 | 2485050   | 2485409   | 360  | + | ENSG00000053918  | 2466221   | 2870221   | inside       | 18829  | <b>KCNQ1</b>    | potassium voltage-gated channel, KQT-like subfamily, member 1                                          |
| 11 | 2548920   | 2548989   | 70   | + | ENSG00000053918  | 2466221   | 2870221   | inside       | 82699  | <b>KCNQ1</b>    | potassium voltage-gated channel, KQT-like subfamily, member 1                                          |
| 11 | 2571399   | 2571525   | 127  | + | ENSG00000053918  | 2466221   | 2870221   | inside       | 105178 | <b>KCNQ1</b>    | potassium voltage-gated channel, KQT-like subfamily, member 1                                          |
| 11 | 2596300   | 2596606   | 307  | + | ENSG00000053918  | 2466221   | 2870221   | inside       | 130079 | <b>KCNQ1</b>    | potassium voltage-gated channel, KQT-like subfamily, member 1                                          |
| 11 | 2612781   | 2612876   | 96   | + | ENSG00000053918  | 2466221   | 2870221   | inside       | 146560 | <b>KCNQ1</b>    | potassium voltage-gated channel, KQT-like subfamily, member 1                                          |
| 11 | 2920617   | 2922068   | 1452 | + | ENSG00000110628  | 2920951   | 2946476   | overlapStart | -334   | <b>SLC22A18</b> | solute carrier family 22, member 18                                                                    |
| 11 | 5248218   | 5248566   | 349  | - | ENSG00000244734  | 5246694   | 5250625   | inside       | 2407   | <b>HBB</b>      | hemoglobin, beta                                                                                       |
| 11 | 27015592  | 27015991  | 400  | + | ENSG00000176971  | 27015628  | 27018630  | overlapStart | -36    | <b>FIBIN</b>    | fin bud initiation factor homolog (zebrafish)                                                          |
| 11 | 30605411  | 30605797  | 387  | - | ENSG00000066382  | 30406040  | 30607930  | inside       | 2519   | <b>MPPED2</b>   | metallophosphoesterase domain containing 2                                                             |
| 11 | 36422377  | 36422557  | 181  | + | ENSG00000135362  | 36397555  | 36486753  | inside       | 24822  | <b>PRR5L</b>    | proline rich 5 like                                                                                    |
| 11 | 60869760  | 60869969  | 210  | + | ENSG00000110448  | 60869930  | 60895319  | overlapStart | -170   | <b>CD5</b>      | CD5 molecule                                                                                           |
| 11 | 63304098  | 63304614  | 517  | + | ENSG00000133321  | 63304273  | 63313929  | overlapStart | -175   | <b>RARRES3</b>  | retinoic acid receptor responder (tazarotene induced) 3                                                |
| 11 | 68607622  | 68607737  | 116  | - | ENSG00000110090  | 68522090  | 68609399  | inside       | 1777   | <b>CPT1A</b>    | carnitine palmitoyltransferase 1A (liver)                                                              |
| 11 | 68621650  | 68622263  | 614  | - | ENSG00000110090  | 68522090  | 68609399  | upstream     | -12251 | <b>CPT1A</b>    | carnitine palmitoyltransferase 1A (liver)                                                              |
| 11 | 75428198  | 75429059  | 862  | + | ENSG00000166391  | 75428888  | 75442660  | overlapStart | -690   | <b>MOGAT2</b>   | monoacylglycerol O-acyltransferase 2                                                                   |
| 11 | 87908783  | 87908938  | 156  | - | ENSG00000123892  | 87846448  | 87908635  | upstream     | -148   | <b>RAB38</b>    | RAB38, member RAS oncogene family                                                                      |
| 11 | 102187898 | 102187976 | 79   | + | ENSG00000023445  | 102188194 | 102208448 | upstream     | -296   | <b>BIRC3</b>    | baculoviral IAP repeat containing 3                                                                    |
| 11 | 104915759 | 104916331 | 573  | - | ENSG000000204397 | 104912053 | 104916051 | overlapStart | 292    | <b>CARD16</b>   | caspase recruitment domain family, member 16                                                           |
| 11 | 114548872 | 114549291 | 420  | + | ENSG00000204361  | 114549200 | 114578285 | overlapStart | -328   | <b>NXPE2</b>    | neurexophilin and PC-esterase domain family, member 2                                                  |
| 11 | 117069780 | 117070046 | 267  | + | ENSG00000149591  | 117070040 | 117075507 | overlapStart | -260   | <b>TAGLN</b>    | transgelin                                                                                             |
| 11 | 124621829 | 124622815 | 987  | - | ENSG000000019102 | 124617368 | 124622134 | overlapStart | 305    | <b>VSIG2</b>    | V-set and immunoglobulin domain containing 2                                                           |
| 12 | 3862575   | 3862597   | 23   | - | ENSG00000130038  | 3724494   | 3862366   | upstream     | -209   | <b>EFCA4B</b>   | EF-hand calcium binding domain 4B                                                                      |
| 12 | 4488749   | 4488893   | 145  | - | ENSG00000118972  | 4477393   | 4488894   | inside       | 145    | <b>FGF23</b>    | fibroblast growth factor 23                                                                            |
| 12 | 6473299   | 6473643   | 345  | - | ENSG00000111319  | 6456015   | 6484715   | inside       | 11416  | <b>SCNN1A</b>   | sodium channel, non-voltage-gated 1 alpha subunit                                                      |
| 12 | 6484219   | 6484607   | 389  | - | ENSG00000111319  | 6456015   | 6484715   | inside       | 496    | <b>SCNN1A</b>   | sodium channel, non-voltage-gated 1 alpha subunit                                                      |
| 12 | 6486639   | 6487080   | 442  | - | ENSG00000111319  | 6456015   | 6484715   | upstream     | -1924  | <b>SCNN1A</b>   | sodium channel, non-voltage-gated 1 alpha subunit                                                      |
| 12 | 13348429  | 13349724  | 1296 | + | ENSG00000134531  | 13349602  | 13369708  | overlapStart | -1173  | <b>EMP1</b>     | epithelial membrane protein 1                                                                          |
| 12 | 49687715  | 49688316  | 602  | + | ENSG00000135406  | 49687485  | 49692465  | inside       | 230    | <b>PRPH</b>     | peripherin                                                                                             |
| 12 | 53497074  | 53497306  | 233  | + | ENSG00000167780  | 53497274  | 53518323  | overlapStart | -200   | <b>SOAT2</b>    | sterol O-acyltransferase 2                                                                             |
| 12 | 54412506  | 54413384  | 879  | + | ENSG00000197757  | 54410642  | 54424607  | inside       | 1864   | <b>HOXC6</b>    | homeobox C6                                                                                            |
| 12 | 56329615  | 56329903  | 289  | + | ENSG00000065357  | 56324946  | 56347805  | inside       | 4669   | <b>DGKA</b>     | diacylglycerol kinase, alpha 80kDa                                                                     |
| 12 | 65515276  | 65515470  | 195  | - | ENSG00000156076  | 65444407  | 65515116  | upstream     | -160   | <b>WIF1</b>     | WNT inhibitory factor 1                                                                                |
| 12 | 65672031  | 65672174  | 144  | + | ENSG00000174099  | 65672488  | 65860678  | upstream     | -457   | <b>MSRB3</b>    | methionine sulfoxide reductase B3                                                                      |
| 12 | 103355190 | 103356060 | 871  | + | ENSG00000139352  | 103351452 | 103354287 | downstream   | 3738   | <b>ASCL1</b>    | achaete-scute family bHLH transcription factor 1                                                       |
| 12 | 113343409 | 113343603 | 195  | + | ENSG00000089127  | 113344739 | 113369794 | upstream     | -1330  | <b>OAS1</b>     | 2'-5'-oligoadenylate synthetase 1, 40/46kDa                                                            |
| 12 | 113415883 | 113416518 | 636  | + | ENSG00000111335  | 113416274 | 113449528 | overlapStart | -391   | <b>OAS2</b>     | 2'-5'-oligoadenylate synthetase 2, 69/71kDa                                                            |
| 13 | 20768138  | 20768560  | 423  | - | ENSG00000165474  | 20761609  | 20767037  | upstream     | -1101  | <b>GJB2</b>     | gap junction protein, beta 2, 26kDa                                                                    |
| 13 | 36050844  | 36053408  | 2565 | - | ENSG00000180660  | 36048322  | 36050832  | upstream     | -12    | <b>MAB21L1</b>  | mab-21-like 1 (C. elegans)                                                                             |
| 13 | 53602385  | 53603286  | 902  | + | ENSG00000102837  | 53602830  | 53626196  | overlapStart | -445   | <b>OLFM4</b>    | olfactomedin 4                                                                                         |
| 13 | 113704976 | 113705742 | 767  | + | ENSG00000057593  | 113760105 | 113774995 | upstream     | -55129 | <b>F7</b>       | coagulation factor VII (serum prothrombin conversion accelerator)                                      |
| 13 | 113743564 | 113744601 | 1038 | + | ENSG00000057593  | 113760105 | 113774995 | upstream     | -16541 | <b>F7</b>       | coagulation factor VII (serum prothrombin conversion accelerator)                                      |
| 13 | 113776126 | 113777013 | 888  | + | ENSG00000126218  | 113777128 | 113803843 | upstream     | -1002  | <b>F10</b>      | coagulation factor X                                                                                   |
| 14 | 94576831  | 94577514  | 684  | + | ENSG00000165949  | 94577079  | 94583033  | overlapStart | -248   | <b>IFI27</b>    | interferon, alpha-inducible protein 27                                                                 |
| 15 | 35086890  | 35086967  | 78   | - | ENSG00000159251  | 35080296  | 35087911  | inside       | 1021   | <b>ACTC1</b>    | actin, alpha, cardiac muscle 1                                                                         |
| 15 | 37398943  | 37399798  | 856  | - | ENSG00000134138  | 37183222  | 37393500  | upstream     | -5443  | <b>MEIS2</b>    | Meis homeobox 2                                                                                        |
| 15 | 45407818  | 45410236  | 2419 | - | ENSG00000140279  | 45384848  | 45406537  | upstream     | -1281  | <b>DUOX2</b>    | dual oxidase 2                                                                                         |
| 15 | 59908999  | 59909035  | 37   | + | ENSG00000140297  | 59903983  | 59913023  | inside       | 5016   | <b>GCNT3</b>    | glucosaminyl (N-acetyl) transferase 3, mucin type                                                      |
| 15 | 78933807  | 78933902  | 96   | - | ENSG00000117971  | 78916461  | 78933587  | upstream     | -220   | <b>CHRN4</b>    | cholinergic receptor, nicotinic, beta 4 (neuronal)                                                     |
| 16 | 2879998   | 2880359   | 362  | + | ENSG00000162078  | 2880170   | 2882285   | overlapStart | -172   | <b>ZG16B</b>    | zymogen granule protein 16B                                                                            |
| 16 | 3067500   | 3068085   | 586  | - | ENSG00000184697  | 3064713   | 3070072   | inside       | 2572   | <b>CLDN6</b>    | claudin 6                                                                                              |
| 16 | 3114986   | 3115809   | 824  | + | ENSG00000008517  | 3115313   | 3119668   | overlapStart | -327   | <b>IL32</b>     | interleukin 32                                                                                         |
| 16 | 23765258  | 23765381  | 124  | + | ENSG00000166869  | 23765948  | 23770272  | upstream     | -690   | <b>CHP2</b>     | calineurin-like EF-hand protein 2                                                                      |
| 16 | 28549923  | 28550637  | 715  | - | ENSG00000176046  | 28548606  | 28550495  | overlapStart | 572    | <b>NUPR1</b>    | nuclear protein, transcriptional regulator, 1                                                          |
| 16 | 30198370  | 30198509  | 140  | + | ENSG00000102879  | 30194892  | 30200397  | inside       | 3478   | <b>CORO1A</b>   | coronin, actin binding protein, 1A                                                                     |
| 16 | 30485383  | 30485966  | 584  | + | ENSG00000005844  | 30483983  | 30534505  | inside       | 1400   | <b>ITGAL</b>    | integrin, alpha L (antigen CD11A (p180)), lymphocyte function-associated antigen 1; alpha polypeptide) |
| 16 | 56665855  | 56666334  | 480  | + | ENSG00000205364  | 56666534  | 56667897  | downstream   | -679   | <b>MT1M</b>     | metallothionein 1M                                                                                     |
| 16 | 56669038  | 56669778  | 741  | + | ENSG00000205364  | 56666534  | 56667897  | downstream   | 2504   | <b>MT1M</b>     | metallothionein 1M                                                                                     |
| 16 | 66982435  | 66982803  | 369  | + | ENSG00000172828  | 66995138  | 67008999  | upstream     | -12703 | <b>CES3</b>     | carboxylesterase 3                                                                                     |
| 16 | 68676451  | 68676806  | 356  | + | ENSG00000062038  | 68678151  | 68732971  | upstream     | -1700  | <b>CDH3</b>     | cadherin 3, type 1, P-cadherin (placental)                                                             |
| 16 | 74734876  | 74735490  | 615  | - | ENSG00000168404  | 74705755  | 74734789  | upstream     | -87    | <b>MLKL</b>     | mixed lineage kinase domain-like                                                                       |
| 17 | 3847872   | 3848506   | 635  | - | ENSG00000074370  | 3822943   | 3867736   | inside       | 19864  | <b>ATP2A3</b>   | ATPase, Ca++ transporting, ubiquitous                                                                  |
| 17 | 4463911   | 4464400   | 490  | - | ENSG00000167741  | 4460224   | 4463876   | upstream     | -35    | <b>GGT6</b>     | gamma-glutamyltransferase 6                                                                            |



|    |          |          |      |   |                 |          |          |              |        |                |                                                                                    |
|----|----------|----------|------|---|-----------------|----------|----------|--------------|--------|----------------|------------------------------------------------------------------------------------|
| 17 | 6659070  | 6659562  | 493  | + | ENSG00000132530 | 6659156  | 6678962  | overlapStart | -86    | <b>XAF1</b>    | XIAP associated factor 1                                                           |
| 17 | 25958267 | 25958673 | 407  | + | ENSG00000168961 | 25956824 | 25976586 | inside       | 1443   | <b>LGALS9</b>  | lectin, galactoside-binding, soluble, 9                                            |
| 17 | 26127438 | 26127542 | 105  | - | ENSG00000007171 | 26083792 | 26127555 | inside       | 117    | <b>NOS2</b>    | nitric oxide synthase 2, inducible                                                 |
| 17 | 37782302 | 37782685 | 384  | + | ENSG00000131771 | 37783179 | 37792879 | upstream     | -877   | <b>PPP1R1B</b> | protein phosphatase 1, regulatory (inhibitor) subunit 1B                           |
| 17 | 38346960 | 38347816 | 857  | + | ENSG00000108352 | 38333309 | 38351908 | inside       | 13651  | <b>RAPGEF1</b> | Rap guanine nucleotide exchange factor (GEF)-like 1                                |
| 17 | 39019545 | 39019978 | 434  | - | ENSG00000187242 | 39017195 | 39023462 | inside       | 3917   | <b>KRT12</b>   | keratin 12                                                                         |
| 17 | 39041110 | 39041602 | 493  | - | ENSG00000171431 | 39030852 | 39041479 | overlapStart | 369    | <b>KRT20</b>   | keratin 20                                                                         |
| 17 | 39969264 | 39970091 | 828  | + | ENSG00000141756 | 39968962 | 39979465 | inside       | 302    | <b>FKBP10</b>  | FK506 binding protein 10, 65 kDa                                                   |
| 17 | 47089952 | 47091521 | 1570 | + | ENSG00000159217 | 47074774 | 47133507 | inside       | 15178  | <b>IGF2BP1</b> | insulin-like growth factor 2 mRNA binding protein 1                                |
| 17 | 47093489 | 47094252 | 764  | + | ENSG00000159217 | 47074774 | 47133507 | inside       | 18715  | <b>IGF2BP1</b> | insulin-like growth factor 2 mRNA binding protein 1                                |
| 17 | 47113407 | 47113596 | 190  | + | ENSG00000159217 | 47074774 | 47133507 | inside       | 38633  | <b>IGF2BP1</b> | insulin-like growth factor 2 mRNA binding protein 1                                |
| 17 | 58226085 | 58226981 | 897  | + | ENSG00000167434 | 58227297 | 58236901 | upstream     | -1212  | <b>CA4</b>     | carbonic anhydrase IV                                                              |
| 17 | 73719885 | 73720840 | 956  | + | ENSG00000132470 | 73717516 | 73753898 | inside       | 2369   | <b>ITGB4</b>   | integrin, beta 4                                                                   |
| 17 | 73727879 | 73728061 | 183  | + | ENSG00000132470 | 73717516 | 73753898 | inside       | 10363  | <b>ITGB4</b>   | integrin, beta 4                                                                   |
| 17 | 80289500 | 80290217 | 718  | - | ENSG00000141574 | 80278900 | 80291921 | inside       | 2421   | <b>SECTM1</b>  | secreted and transmembrane 1                                                       |
| 18 | 56528679 | 56531159 | 2481 | + | ENSG00000074657 | 56529832 | 56653712 | overlapStart | -1153  | <b>ZNF532</b>  | zinc finger protein 532                                                            |
| 19 | 310296   | 310512   | 217  | - | ENSG00000141934 | 281048   | 291435   | upstream     | -18861 | <b>PPAP2C</b>  | phosphatidic acid phosphatase type 2C                                              |
| 19 | 4326975  | 4327350  | 376  | - | ENSG00000178078 | 4324041  | 4338847  | inside       | 11872  | <b>STAP2</b>   | signal transducing adaptor family member 2                                         |
| 19 | 4328745  | 4328818  | 74   | - | ENSG00000178078 | 4324041  | 4338847  | inside       | 10102  | <b>STAP2</b>   | signal transducing adaptor family member 2                                         |
| 19 | 5838729  | 5838999  | 271  | - | ENSG00000156413 | 5830637  | 5839742  | inside       | 1013   | <b>FUT6</b>    | fucosyltransferase 6 (alpha 1,3) fucosyltransferase)                               |
| 19 | 5846552  | 5846599  | 48   | - | ENSG00000171124 | 5842900  | 5851485  | inside       | 4933   | <b>FUT3</b>    | fucosyltransferase 3 (galactoside 3(4)-L-fucosyltransferase, Lewis blood group)    |
| 19 | 5851255  | 5851762  | 508  | - | ENSG00000171124 | 5842900  | 5851485  | overlapStart | 230    | <b>FUT3</b>    | fucosyltransferase 3 (galactoside 3(4)-L-fucosyltransferase, Lewis blood group)    |
| 19 | 13120987 | 13123217 | 2231 | + | ENSG00000008441 | 13106584 | 13209610 | inside       | 14403  | <b>NFIX</b>    | nuclear factor I/X (CCAAT-binding transcription factor)                            |
| 19 | 13124604 | 13125851 | 1248 | + | ENSG00000008441 | 13106584 | 13209610 | inside       | 18020  | <b>NFIX</b>    | nuclear factor I/X (CCAAT-binding transcription factor)                            |
| 19 | 13127389 | 13127873 | 485  | + | ENSG00000008441 | 13106584 | 13209610 | inside       | 20805  | <b>NFIX</b>    | nuclear factor I/X (CCAAT-binding transcription factor)                            |
| 19 | 15783239 | 15783848 | 610  | + | ENSG00000186204 | 15783886 | 15807984 | upstream     | -647   | <b>CYP4F12</b> | cytochrome P450, family 4, subfamily F, polypeptide 12                             |
| 19 | 16045708 | 16046185 | 478  | - | ENSG00000171903 | 16023180 | 16045676 | upstream     | -32    | <b>CYP4F11</b> | cytochrome P450, family 4, subfamily F, polypeptide 11                             |
| 19 | 18539756 | 18539843 | 88   | - | ENSG00000105655 | 18545625 | 18548943 | downstream   | 9187   | <b>ISYNA1</b>  | inositol 3-phosphate synthase 1                                                    |
| 19 | 18543829 | 18545062 | 1234 | - | ENSG00000105655 | 18545625 | 18548943 | downstream   | 5114   | <b>ISYNA1</b>  | inositol 3-phosphate synthase 1                                                    |
| 19 | 22234992 | 22235199 | 208  | + | ENSG00000197134 | 22235266 | 22273901 | upstream     | -274   | <b>ZNF257</b>  | zinc finger protein 257                                                            |
| 19 | 35530755 | 35531417 | 663  | + | ENSG00000105707 | 35531410 | 35557475 | overlapStart | -655   | <b>HPN</b>     | hepsin                                                                             |
| 19 | 37096148 | 37096588 | 441  | + | ENSG00000161298 | 37095719 | 37119744 | inside       | 429    | <b>ZNF382</b>  | zinc finger protein 382                                                            |
| 19 | 40421453 | 40421743 | 291  | - | ENSG00000090920 | 40353964 | 40440533 | inside       | 19080  | <b>FCGBP</b>   | Fc fragment of IgG binding protein                                                 |
| 19 | 45150513 | 45150725 | 213  | + | ENSG00000073008 | 45147098 | 45169429 | inside       | 3415   | <b>PVR</b>     | poliovirus receptor                                                                |
| 19 | 45315572 | 45316682 | 1111 | + | ENSG00000187244 | 45312338 | 45324677 | inside       | 3234   | <b>BCAM</b>    | basal cell adhesion molecule (Lutheran blood group)                                |
| 19 | 46917018 | 46917255 | 238  | - | ENSG00000169515 | 46914451 | 46916067 | upstream     | -951   | <b>CCDC8</b>   | coiled-coil domain containing 8                                                    |
| 19 | 49685846 | 49686254 | 409  | + | ENSG00000130529 | 49661052 | 49715091 | inside       | 24794  | <b>TRPM4</b>   | transient receptor potential cation channel, subfamily M, member 4                 |
| 19 | 49713645 | 49714044 | 400  | + | ENSG00000130529 | 49661052 | 49715091 | inside       | 52593  | <b>TRPM4</b>   | transient receptor potential cation channel, subfamily M, member 4                 |
| 19 | 57276642 | 57276917 | 276  | - | ENSG00000198300 | 57285930 | 57352075 | downstream   | 75433  | <b>PEG3</b>    | paternally expressed 3                                                             |
| 19 | 58220080 | 58220837 | 758  | - | ENSG00000179909 | 58208735 | 58220579 | overlapStart | 499    | <b>ZNF154</b>  | zinc finger protein 154                                                            |
| 20 | 1310425  | 1310884  | 460  | - | ENSG00000125775 | 1290619  | 1309883  | upstream     | -542   | <b>SDCBP2</b>  | syndecan binding protein (syntenin) 2                                              |
| 20 | 33451149 | 33451427 | 279  | + | ENSG00000131069 | 33459949 | 33515765 | upstream     | -8800  | <b>ACSS2</b>   | acyl-CoA synthetase short-chain family member 2                                    |
| 20 | 36148133 | 36148275 | 143  | + | ENSG00000053438 | 36149617 | 36152092 | upstream     | -1484  | <b>NNAT</b>    | neuronatin                                                                         |
| 20 | 36148615 | 36149194 | 580  | + | ENSG00000053438 | 36149617 | 36152092 | upstream     | -1002  | <b>NNAT</b>    | neuronatin                                                                         |
| 20 | 36149452 | 36150061 | 610  | + | ENSG00000053438 | 36149617 | 36152092 | overlapStart | -165   | <b>NNAT</b>    | neuronatin                                                                         |
| 20 | 62167942 | 62168955 | 1014 | - | ENSG00000101213 | 62159778 | 62168695 | overlapStart | 753    | <b>PTK6</b>    | protein tyrosine kinase 6                                                          |
| 21 | 15645787 | 15646635 | 849  | + | ENSG00000243064 | 15646120 | 15735075 | overlapStart | -333   | <b>ABCC13</b>  | ATP-binding cassette, sub-family C (CFTR/MRP), member 13, pseudogene               |
| 21 | 22369485 | 22370237 | 753  | + | ENSG00000154654 | 22370633 | 22915650 | upstream     | -1148  | <b>NCAM2</b>   | neural cell adhesion molecule 2                                                    |
| 21 | 42797588 | 42797953 | 366  | + | ENSG00000157601 | 42792231 | 42831141 | inside       | 5357   | <b>MX1</b>     | myxovirus (influenza virus) resistance 1, interferon-inducible protein p78 (mouse) |
| 21 | 43736736 | 43737065 | 330  | - | ENSG00000160180 | 43726682 | 43735761 | upstream     | -975   | <b>TFF3</b>    | trefoil factor 3 (intestinal)                                                      |
| 22 | 32438947 | 32439052 | 106  | + | ENSG00000100170 | 32439019 | 32509016 | overlapStart | -72    | <b>SLC5A1</b>  | solute carrier family 5 (sodium/glucose cotransporter), member 1                   |
| 22 | 36044151 | 36044792 | 642  | + | ENSG00000221963 | 36044442 | 36057404 | overlapStart | -291   | <b>APOL6</b>   | apolipoprotein L, 6                                                                |
| 22 | 36648832 | 36649144 | 313  | + | ENSG00000100342 | 36649056 | 36663576 | overlapStart | -224   | <b>APOL1</b>   | apolipoprotein L, 1                                                                |



|            |        |        |        |           |           |       |                   |                                     |   |                          |         |
|------------|--------|--------|--------|-----------|-----------|-------|-------------------|-------------------------------------|---|--------------------------|---------|
| cg00579921 | 1.678  | -0.135 | 4.645  | 5.801E-05 | 7.647E-03 | 1.831 | HLA-DRB5          | NM_002125                           | 6 | chr6:32489742-32490128   | Island  |
| cg00750366 | -1.619 | 2.843  | -4.299 | 1.551E-04 | 9.783E-03 | 0.931 | HLA-DPB1          | NM_002121                           | 6 | chr6:33048416-33048814   | N_Shelf |
| cg01016122 | 1.549  | -1.963 | 6.390  | 3.875E-07 | 3.050E-03 | 6.403 | PSORS1C1          | NM_014068                           | 6 |                          |         |
| cg01132696 | 1.536  | -1.951 | 5.279  | 9.371E-06 | 6.241E-03 | 3.499 | HLA-DPB1          | NM_002121                           | 6 | chr6:33048416-33048814   | Island  |
| cg01673307 | -2.296 | 1.493  | -5.707 | 2.729E-06 | 5.274E-03 | 4.627 | TAP1              | NM_000593                           | 6 | chr6:32820849-32822370   | N_Shore |
| cg01745539 | -1.608 | -1.430 | -4.968 | 2.296E-05 | 6.872E-03 | 2.679 | HLA-DQB1          | NM_002123                           | 6 | chr6:32632158-32633027   | Island  |
| cg01804934 | -2.284 | 1.044  | -5.003 | 2.076E-05 | 6.756E-03 | 2.771 | HLA-DPA1          | NM_033554                           | 6 |                          |         |
| cg02181920 | -1.529 | 0.424  | -4.940 | 2.486E-05 | 6.944E-03 | 2.606 | TAP1              | NM_000593                           | 6 | chr6:32820849-32822370   | N_Shore |
| cg02756056 | -1.528 | 1.479  | -5.999 | 1.179E-06 | 4.361E-03 | 5.392 | TAP1,PSMB8        | NM_000593;NM_004159                 | 6 | chr6:32811494-32811839   | S_Shore |
| cg02806715 | -1.978 | 0.407  | -5.783 | 2.192E-06 | 5.104E-03 | 4.827 | HLA-DMA           | NM_006120                           | 6 |                          |         |
| cg03009030 | -1.632 | 1.590  | -5.342 | 7.806E-06 | 6.184E-03 | 3.666 | HLA-DPA1          | NM_033554                           | 6 |                          |         |
| cg04461101 | -2.455 | -0.305 | -5.597 | 3.742E-06 | 5.749E-03 | 4.339 |                   |                                     | 6 |                          |         |
| cg05358170 | -1.639 | 2.530  | -4.912 | 2.697E-05 | 7.010E-03 | 2.532 | HLA-F;HLA-F;HLA-F | NM_001098478;NM_001098479;NM_018950 | 6 | chr6:29691106-29692093   | S_Shore |
| cg05938207 | 1.718  | -1.227 | 5.454  | 5.659E-06 | 6.014E-03 | 3.961 | HLA-DRB5          | NM_002125                           | 6 | chr6:32489742-32490128   | Island  |
| cg06032479 | 1.589  | -0.576 | 5.835  | 1.888E-06 | 4.767E-03 | 4.963 | HLA-DRB1          | NM_002124                           | 6 | chr6:32551851-32552331   | Island  |
| cg06271046 | -2.189 | -0.992 | -4.894 | 2.841E-05 | 7.010E-03 | 2.484 |                   |                                     | 6 |                          |         |
| cg06422189 | -1.847 | 1.515  | -5.194 | 1.195E-05 | 6.303E-03 | 3.277 | HLA-B             | NM_005514                           | 6 | chr6:31323946-31325211   | N_Shore |
| cg06504039 | 1.635  | 1.739  | 4.583  | 6.914E-05 | 7.947E-03 | 1.670 | HLA-DOA           | NM_002119                           | 6 | chr6:32975684-32975926   | S_Shelf |
| cg06791592 | -1.715 | 2.464  | -5.056 | 1.778E-05 | 6.630E-03 | 2.913 | PSMB9;PSMB9       | NM_002800;NM_148954                 | 6 | chr6:32820849-32822370   | S_Shore |
| cg07156249 | -2.534 | 0.267  | -5.511 | 4.795E-06 | 5.961E-03 | 4.112 | PSMB9;PSMB9;TAP1  | NM_002800;NM_148954;NM_000593       | 6 | chr6:32820849-32822370   | S_Shore |
| cg07218288 | -2.386 | -1.653 | -6.318 | 4.757E-07 | 3.180E-03 | 6.217 | PSMB8;PSMB8;TAP1  | NM_004159;NM_148919;NM_000593       | 6 | chr6:32811494-32811839   | S_Shore |
| cg07984380 | -3.802 | -1.899 | -4.551 | 7.584E-05 | 8.092E-03 | 1.585 | HLA-DRB1          | NM_002124                           | 6 |                          |         |
| cg08735211 | -1.848 | 1.367  | -5.708 | 2.721E-06 | 5.274E-03 | 4.629 | HLA-DMA           | NM_006120                           | 6 |                          |         |
| cg08845336 | 2.396  | -0.337 | 4.812  | 3.593E-05 | 7.119E-03 | 2.269 | HLA-DRB1          | NM_002124                           | 6 | chr6:32551851-32552331   | Island  |
| cg09139047 | 2.451  | -1.398 | 5.330  | 8.073E-06 | 6.186E-03 | 3.636 | HLA-DRB1          | NM_002124                           | 6 | chr6:32551851-32552331   | Island  |
| cg09234582 | 1.733  | -0.463 | 7.150  | 4.599E-08 | 1.413E-03 | 8.326 | HLA-DPB1          | NM_002121                           | 6 | chr6:33048416-33048814   | N_Shore |
| cg09321817 | -2.614 | 0.854  | -5.711 | 2.698E-06 | 5.264E-03 | 4.637 | HLA-DPA1          | NM_033554                           | 6 |                          |         |
| cg10180404 | -1.556 | -1.032 | -4.772 | 4.033E-05 | 7.230E-03 | 2.163 | HLA-DQB1          | NM_002123                           | 6 | chr6:32632158-32633027   | Island  |
| cg10466124 | -2.583 | -4.173 | -6.770 | 1.326E-07 | 2.247E-03 | 7.373 | HLA-DRB5          | NM_002125                           | 6 |                          |         |
| cg10518264 | -1.886 | 1.340  | -5.682 | 2.928E-06 | 5.360E-03 | 4.563 | HLA-DMB           | NM_002118                           | 6 |                          |         |
| cg10817441 | -1.892 | 1.273  | -6.105 | 8.708E-07 | 3.953E-03 | 5.668 | PSMB9;PSMB9       | NM_002800;NM_148954                 | 6 | chr6:32820849-32822370   | S_Shore |
| cg10921592 | -1.968 | 2.827  | -5.322 | 8.260E-06 | 6.216E-03 | 3.615 | HLA-DPA1          | NM_033554                           | 6 |                          |         |
| cg11404906 | 2.515  | -0.906 | 5.737  | 2.499E-06 | 5.252E-03 | 4.707 | HLA-DRB1          | NM_002124                           | 6 | chr6:32551851-32552331   | N_Shore |
| cg11451043 | -1.545 | -1.961 | -5.340 | 7.847E-06 | 6.184E-03 | 3.662 | HLA-DPA1          | NM_033554                           | 6 |                          |         |
| cg11594821 | -1.509 | 1.420  | -5.330 | 8.077E-06 | 6.186E-03 | 3.635 | HLA-E             | NM_005516                           | 6 | chr6:30457369-30458175   | S_Shore |
| cg11617938 | -1.560 | 0.554  | -5.706 | 2.736E-06 | 5.274E-03 | 4.624 | HLA-F;HLA-F;HLA-F | NM_001098478;NM_001098479;NM_018950 | 6 | chr6:29691106-29692093   | S_Shore |
| cg11706729 | -1.999 | -1.402 | -6.273 | 5.398E-07 | 3.491E-03 | 6.102 | PSMB8;PSMB8;TAP1  | NM_004159;NM_148919;NM_000593       | 6 | chr6:32811494-32811839   | S_Shore |
| cg12537337 | -1.930 | -1.030 | -5.186 | 1.223E-05 | 6.327E-03 | 3.256 | BTN3A3;BTN3A3     | NM_197974;NM_006994                 | 6 |                          |         |
| cg12736254 | -1.640 | 0.652  | -5.849 | 1.815E-06 | 4.762E-03 | 4.999 | HLA-DRB1          | NM_002124                           | 6 |                          |         |
| cg13065507 | -1.617 | 2.087  | -7.074 | 5.686E-08 | 1.413E-03 | 8.135 |                   |                                     | 6 |                          |         |
| cg14140375 | -1.694 | 1.651  | -5.996 | 1.191E-06 | 4.361E-03 | 5.382 | HLA-F;HLA-F;HLA-F | NM_001098478;NM_001098479;NM_018950 | 6 | chr6:29691106-29692093   | S_Shore |
| cg14645244 | 2.586  | -2.181 | 5.968  | 1.290E-06 | 4.415E-03 | 5.310 | HLA-DRB1          | NM_002124                           | 6 | chr6:32551851-32552331   | Island  |
| cg14870156 | 2.454  | -0.920 | 6.208  | 6.491E-07 | 3.648E-03 | 5.935 | HLA-DPB1          | NM_002121                           | 6 | chr6:33048416-33048814   | Island  |
| cg15575880 | -2.305 | 0.412  | -5.044 | 1.840E-05 | 6.663E-03 | 2.882 | HLA-DPA1          | NM_033554                           | 6 |                          |         |
| cg16186435 | -1.694 | 1.165  | -5.554 | 4.241E-06 | 5.901E-03 | 4.224 | PSMB8;PSMB8       | NM_004159;NM_148919                 | 6 | chr6:32811494-32811839   | N_Shore |
| cg16465027 | -2.335 | -0.363 | -6.442 | 3.340E-07 | 2.970E-03 | 6.537 |                   |                                     | 6 |                          |         |
| cg16890093 | -1.663 | 1.390  | -5.769 | 2.285E-06 | 5.192E-03 | 4.789 | PSMB8;PSMB8;TAP1  | NM_004159;NM_148919;NM_000593       | 6 | chr6:32811494-32811839   | S_Shore |
| cg17022232 | -1.557 | 2.097  | -5.020 | 1.973E-05 | 6.743E-03 | 2.818 | HLA-DMB           | NM_002118                           | 6 |                          |         |
| cg17159161 | -1.839 | -4.107 | -6.361 | 4.210E-07 | 3.180E-03 | 6.328 | HLA-B             | NM_005514                           | 6 | chr6:31323946-31325211   | N_Shore |
| cg17316649 | 1.813  | -1.280 | 6.728  | 1.493E-07 | 2.326E-03 | 7.266 | HLA-DRB1          | NM_002124                           | 6 | chr6:32551851-32552331   | Island  |
| cg17369694 | -5.034 | -2.751 | -6.711 | 1.567E-07 | 2.326E-03 | 7.222 | HLA-DRB5          | NM_002125                           | 6 |                          |         |
| cg17626301 | -2.112 | 0.677  | -5.113 | 1.509E-05 | 6.580E-03 | 3.064 | TAP1              | NM_000593                           | 6 | chr6:32820849-32822370   | N_Shore |
| cg19300401 | -4.688 | 1.600  | -4.757 | 4.202E-05 | 7.271E-03 | 2.126 |                   |                                     | 6 |                          |         |
| cg19455396 | -2.905 | 3.607  | -7.674 | 1.098E-08 | 9.839E-04 | 9.606 | TAP2;TAP2         | NM_000544;NM_018833                 | 6 |                          |         |
| cg19575208 | 2.077  | -0.310 | 4.352  | 1.336E-04 | 9.365E-03 | 1.068 | HLA-DRB1          | NM_002124                           | 6 | chr6:32551851-32552331   | Island  |
| cg19990651 | 1.564  | -1.735 | 4.941  | 2.478E-05 | 6.944E-03 | 2.609 | HLA-DPB1          | NM_002121                           | 6 | chr6:33048416-33048814   | Island  |
| cg20907136 | -1.664 | -0.714 | -4.548 | 7.642E-05 | 8.098E-03 | 1.578 | HLA-DPA1          | NM_033554                           | 6 |                          |         |
| cg22731440 | -2.073 | 0.344  | -7.399 | 2.320E-08 | 9.839E-04 | 8.939 | HLA-B             | NM_005514                           | 6 | chr6:31323946-31325211   | N_Shore |
| cg23232773 | -1.574 | -0.122 | -5.520 | 4.667E-06 | 5.959E-03 | 4.137 | HCP5              | NM_006674                           | 6 |                          |         |
| cg23923934 | -1.589 | 2.010  | -5.145 | 1.377E-05 | 6.464E-03 | 3.147 | HLA-B             | NM_005514                           | 6 | chr6:31323946-31325211   | N_Shore |
| cg24111025 | -2.103 | 1.841  | -4.896 | 2.820E-05 | 7.010E-03 | 2.491 | TAP1              | NM_000593                           | 6 | chr6:32820849-32822370   | N_Shore |
| cg24129356 | -2.027 | 0.320  | -5.746 | 2.441E-06 | 5.241E-03 | 4.729 | HLA-DMA           | NM_006120                           | 6 |                          |         |
| cg24287218 | -1.672 | 0.515  | -4.965 | 2.316E-05 | 6.874E-03 | 2.671 | HLA-DPA1          | NM_033554                           | 6 |                          |         |
| cg24421410 | -1.889 | 0.721  | -5.414 | 6.348E-06 | 6.014E-03 | 3.856 | HLA-DMA           | NM_006120                           | 6 |                          |         |
| cg24638099 | -3.248 | 0.131  | -4.677 | 5.294E-05 | 7.498E-03 | 1.914 | HLA-DRB6          | NR_001298                           | 6 |                          |         |
| cg24898914 | -1.505 | 2.838  | -5.407 | 6.471E-06 | 6.014E-03 | 3.838 | PSMB8;PSMB8       | NM_004159;NM_148919                 | 6 | chr6:32811494-32811839   | N_Shore |
| cg25042789 | -2.726 | -0.077 | -5.622 | 3.481E-06 | 5.579E-03 | 4.404 | TAP1              | NM_000593                           | 6 | chr6:32820849-32822370   | N_Shore |
| cg25045942 | 1.810  | -0.145 | 7.087  | 5.486E-08 | 1.413E-03 | 8.167 | HLA-DPB1          | NM_002121                           | 6 | chr6:33048416-33048814   | N_Shore |
| cg25824217 | -1.865 | 1.531  | -4.427 | 1.079E-04 | 8.838E-03 | 1.262 | HLA-DPA1          | NM_033554                           | 6 |                          |         |
| cg25954539 | -2.604 | -2.361 | -7.440 | 2.073E-08 | 9.839E-04 | 9.039 | HLA-B             | NM_005514                           | 6 | chr6:31323946-31325211   | N_Shore |
| cg26033526 | -2.201 | 0.928  | -5.572 | 4.023E-06 | 5.827E-03 | 4.272 | TAP1              | NM_000593                           | 6 | chr6:32820849-32822370   | N_Shore |
| cg26234900 | -1.896 | 0.706  | -5.151 | 1.352E-05 | 6.438E-03 | 3.164 | TAP1              | NM_000593                           | 6 | chr6:32820849-32822370   | N_Shore |
| cg26645432 | 1.765  | -0.045 | 5.906  | 1.539E-06 | 4.539E-03 | 5.149 | HLA-DPB1          | NM_002121                           | 6 | chr6:33048416-33048814   | Island  |
| cg26725201 | -1.509 | 1.332  | -6.423 | 3.528E-07 | 2.970E-03 | 6.488 |                   |                                     | 6 |                          |         |
| cg27543214 | -2.860 | 0.201  | -5.575 | 3.994E-06 | 5.825E-03 | 4.279 |                   |                                     | 6 |                          |         |
| cg00733385 | 1.596  | 0.881  | 4.799  | 3.734E-05 | 7.145E-03 | 2.234 | ZNF775            | NM_173680                           | 7 | chr7:150093636-150095229 | N_Shore |
| cg07878625 | 3.838  | 2.309  | 5.391  | 6.785E-06 | 6.116E-03 | 3.795 | ZNF783            | NR_015357                           | 7 | chr7:148978762-148979390 | N_Shore |
| cg19453938 | -1.974 | -1.274 | -4.454 | 1.001E-04 | 8.653E-03 | 1.332 |                   |                                     | 7 | chr7:73269934-73270232   | N_Shelf |
| cg25543264 | 3.360  | -1.579 | 7.454  | 1.993E-08 | 9.839E-04 | 9.074 | COBL              | NM_015198                           | 7 |                          |         |

|            |        |        |        |           |           |       |                            |                         |    |                           |         |
|------------|--------|--------|--------|-----------|-----------|-------|----------------------------|-------------------------|----|---------------------------|---------|
| cg26204448 | -1.928 | 2.538  | -5.180 | 1.245E-05 | 6.363E-03 | 3.239 | MAD1L1;MAD1L1;MAD1L1       | NM_003550;NM_001013837  | 7  |                           |         |
| cg26570844 | 1.689  | 0.451  | 5.433  | 6.004E-06 | 6.014E-03 | 3.907 | CUX1;CUX1;CUX1             | NM_181500;NM_181552;N   | 7  |                           |         |
| cg02938066 | 1.729  | 1.833  | 5.680  | 2.948E-06 | 5.374E-03 | 4.556 | NFKBIL2                    | NM_013432               | 8  | chr8:145653335-145654145  | S_Shelf |
| cg03128890 | -1.680 | 1.106  | -5.450 | 5.718E-06 | 6.014E-03 | 3.951 |                            |                         | 8  |                           |         |
| cg04025970 | -1.633 | 2.666  | -5.131 | 1.434E-05 | 6.519E-03 | 3.110 | MFHAS1                     | NM_004225               | 8  |                           |         |
| cg12622242 | -1.592 | 3.831  | -5.430 | 6.058E-06 | 6.014E-03 | 3.898 | SH2D4A                     | NM_022071               | 8  |                           |         |
| cg19867107 | -1.662 | -1.479 | -4.425 | 1.086E-04 | 8.849E-03 | 1.257 |                            |                         | 8  |                           |         |
| cg23632791 | -1.779 | 1.749  | -4.396 | 1.180E-04 | 9.061E-03 | 1.181 | RIPK2                      | NM_003821               | 8  |                           |         |
| cg24996280 | 1.506  | -0.315 | 5.996  | 1.189E-06 | 4.361E-03 | 5.384 | TSNARE1                    | NM_145003               | 8  | chr8:143484018-143485051  | N_Shelf |
| cg11401986 | -1.694 | -0.115 | -5.290 | 9.056E-06 | 6.241E-03 | 3.531 |                            |                         | 9  | chr9:91605764-91606141    | N_Shore |
| cg13412834 | -1.946 | 1.461  | -4.747 | 4.323E-05 | 7.295E-03 | 2.100 | FNBP1                      | NM_015033               | 9  | chr9:132652350-132652715  | S_Shore |
| cg13698224 | -1.643 | 1.000  | -5.175 | 1.264E-05 | 6.389E-03 | 3.225 | NTRK2;NTRK2;NTRK2;NTRK2;   | NM_001018064;NM_001007  | 9  |                           |         |
|            |        |        |        |           |           |       | NTRK2                      | 097;NM_006180;NM_00101  |    |                           |         |
|            |        |        |        |           |           |       |                            | 8065;NM_001018066       |    |                           |         |
| cg06976598 | -1.616 | -0.682 | -4.562 | 7.343E-05 | 8.037E-03 | 1.615 | PRKG1;PRKG1                | NM_001098512;NM_006258  | 10 |                           |         |
| cg12421087 | 3.869  | 2.369  | 5.276  | 9.439E-06 | 6.241E-03 | 3.493 | C10orf110;C10orf110;C10orf | NR_024629;NR_027708;NR_ | 10 |                           |         |
|            |        |        |        |           |           |       | 110;C10orf110              | 027709;NR_024628        |    |                           |         |
| cg12501287 | -3.118 | 1.851  | -4.660 | 5.549E-05 | 7.564E-03 | 1.871 | INPP5A                     | NM_005539               | 10 | chr10:134411241-134411481 | Island  |
| cg15633369 | -1.555 | 0.851  | -6.151 | 7.652E-07 | 3.725E-03 | 5.785 | PRKG1;PRKG1                | NM_001098512;NM_006258  | 10 |                           |         |
| cg16526673 | -1.546 | 1.721  | -5.301 | 8.783E-06 | 6.241E-03 | 3.559 | C10orf81                   | NM_024889               | 10 |                           |         |
| cg17723206 | 4.712  | 1.390  | 4.551  | 7.581E-05 | 8.092E-03 | 1.586 |                            |                         | 10 | chr10:118934734-118935180 | N_Shelf |
| cg26974214 | -2.154 | 0.520  | -5.176 | 1.258E-05 | 6.383E-03 | 3.230 | IFIT1                      | NM_001548               | 10 |                           |         |
| cg04998327 | -3.155 | 1.399  | -6.076 | 9.468E-07 | 4.064E-03 | 5.591 |                            |                         | 11 |                           |         |
| cg04999352 | -1.723 | -0.302 | -5.123 | 1.468E-05 | 6.538E-03 | 3.089 | RARRES3                    | NM_004585               | 11 |                           |         |
| cg06394820 | -2.905 | 0.945  | -4.773 | 4.019E-05 | 7.220E-03 | 2.167 | CCDC86                     | NM_024098               | 11 | chr11:60609392-60609786   | N_Shore |
| cg07589078 | -1.802 | 1.966  | -4.578 | 7.015E-05 | 7.986E-03 | 1.657 | OR51A2                     | NM_001004748            | 11 |                           |         |
| cg07884764 | -1.973 | 1.526  | -4.980 | 2.216E-05 | 6.816E-03 | 2.712 | CCDC88B                    | NM_032251               | 11 | chr11:64109822-64110228   | N_Shelf |
| cg10415021 | 3.617  | 2.120  | 5.068  | 1.718E-05 | 6.607E-03 | 2.944 |                            |                         | 11 |                           |         |
| cg13866253 | -1.884 | 0.649  | -6.615 | 2.050E-07 | 2.548E-03 | 6.979 | PAK1;PAK1                  | NM_002576;NM_001128620  | 11 |                           |         |
| cg19680693 | -3.703 | -1.880 | -5.535 | 4.479E-06 | 5.959E-03 | 4.174 | GPR83                      | NM_016540               | 11 |                           |         |
| cg21093670 | -1.988 | 4.393  | -5.082 | 1.653E-05 | 6.607E-03 | 2.980 |                            |                         | 11 | chr11:129685737-129686211 | N_Shore |
| cg24135977 | -1.734 | 1.260  | -4.659 | 5.577E-05 | 7.564E-03 | 1.867 |                            |                         | 11 |                           |         |
| cg24496021 | 1.501  | 0.253  | 5.609  | 3.613E-06 | 5.706E-03 | 4.370 | FCHSD2                     | NM_014824               | 11 |                           |         |
| cg25320388 | -1.809 | -0.060 | -4.324 | 1.449E-04 | 9.597E-03 | 0.993 |                            |                         | 11 |                           |         |
| cg25574765 | -1.533 | 3.171  | -5.554 | 4.234E-06 | 5.901E-03 | 4.226 | PPFIA1;PPFIA1              | NM_003626;NM_177423     | 11 |                           |         |
| cg26567385 | 5.083  | 0.353  | 6.051  | 1.017E-06 | 4.123E-03 | 5.526 |                            |                         | 11 |                           |         |
| cg27429749 | -1.523 | -2.321 | -4.722 | 4.645E-05 | 7.369E-03 | 2.034 | UBE2L6;UBE2L6              | NM_004223;NM_198183     | 11 | chr11:57334971-57335486   | N_Shore |
| cg03188000 | -2.421 | -0.172 | -5.886 | 1.632E-06 | 4.615E-03 | 5.095 |                            |                         | 12 |                           |         |
| cg06766860 | -2.813 | 2.147  | -5.692 | 2.845E-06 | 5.297E-03 | 4.589 | GALNT9                     | NM_001122636            | 12 | chr12:132865236-132865506 | N_Shore |
| cg08072862 | 1.519  | -2.161 | 4.337  | 1.394E-04 | 9.492E-03 | 1.028 | CCDC42B                    | NM_001144872            | 12 | chr12:113590806-113591304 | N_Shelf |
| cg09339156 | 2.011  | -1.184 | 4.437  | 1.049E-04 | 8.774E-03 | 1.289 | CCDC42B                    | NM_001144872            | 12 | chr12:113590806-113591304 | N_Shelf |
| cg13380890 | -1.541 | 0.489  | -4.639 | 5.897E-05 | 7.666E-03 | 1.815 |                            |                         | 12 |                           |         |
| cg16965605 | -2.127 | 1.122  | -6.210 | 6.467E-07 | 3.648E-03 | 5.938 | HMGA2                      | NM_003483               | 12 |                           |         |
| cg21582325 | -1.500 | -1.357 | -5.504 | 4.899E-06 | 5.961E-03 | 4.093 |                            |                         | 12 |                           |         |
| cg23159970 | 4.820  | -1.658 | 4.703  | 4.907E-05 | 7.406E-03 | 1.984 | CACNA1C;CACNA1C;CACNA1     | NM_001129844;NM_001129  | 12 |                           |         |
|            |        |        |        |           |           |       | C;CACNA1C;CACNA1C;CACN     | 827;NM_001129839;NM_00  |    |                           |         |
|            |        |        |        |           |           |       | A1C;CACNA1C;CACNA1C;CAC    | 1129834;NM_001129841;N  |    |                           |         |
|            |        |        |        |           |           |       | NA1C;CACNA1C;CACNA1C;C     | M_000719;NM_001129830;  |    |                           |         |
|            |        |        |        |           |           |       | ACNA1C;CACNA1C;CACNA1C     | NM_001167625;NM_001129  |    |                           |         |
|            |        |        |        |           |           |       | ;CACNA1C;CACNA1C;CACNA     | 843;NM_001167624;NM_00  |    |                           |         |
|            |        |        |        |           |           |       | 1C;CACNA1C;CACNA1C;CACN    | 1129835;NM_001129837;N  |    |                           |         |
|            |        |        |        |           |           |       | A1C;CACNA1C;CACNA1C;CAC    | M_001167623;NM_0011298  |    |                           |         |
|            |        |        |        |           |           |       | NA1C                       | 40;NM_199460;NM_001129  |    |                           |         |
|            |        |        |        |           |           |       |                            | 833;NM_001129832;NM_00  |    |                           |         |
|            |        |        |        |           |           |       |                            | 1129829;NM_001129846;N  |    |                           |         |
|            |        |        |        |           |           |       |                            | M_001129836;NM_0011298  |    |                           |         |
|            |        |        |        |           |           |       |                            | 38;NM_001129831;NM_001  |    |                           |         |
|            |        |        |        |           |           |       |                            | 129842                  |    |                           |         |
| cg24838063 | -2.196 | 2.781  | -4.781 | 3.926E-05 | 7.183E-03 | 2.188 | PIWIL1                     | NM_004764               | 12 | chr12:130822360-130822696 | Island  |
| cg07499182 | -1.791 | -1.302 | -4.622 | 6.201E-05 | 7.766E-03 | 1.770 | STARD13                    | NM_178006               | 13 |                           |         |
| cg07926092 | 1.570  | -2.257 | 5.220  | 1.108E-05 | 6.241E-03 | 3.346 | RNF219                     | NM_024546               | 13 | chr13:79232822-79233417   | S_Shore |
| cg12578486 | -1.993 | 0.272  | -5.361 | 7.386E-06 | 6.148E-03 | 3.717 | UBAC2;UBAC2;UBAC2          | NM_001144072;NM_177967  | 13 |                           |         |
|            |        |        |        |           |           |       |                            | ;NR_026644              |    |                           |         |
| cg05875421 | -2.196 | 1.814  | -4.401 | 1.165E-04 | 9.030E-03 | 1.193 | GPR68                      | NM_003485               | 14 |                           |         |
| cg08147389 | -1.886 | 0.774  | -5.372 | 7.154E-06 | 6.134E-03 | 3.746 | NUMB;NUMB;NUMB;NUMB        | NM_001005745;NM_001005  | 14 |                           |         |
|            |        |        |        |           |           |       |                            | 743;NM_003744;NM_00100  |    |                           |         |
|            |        |        |        |           |           |       |                            | 5744                    |    |                           |         |
| cg08164191 | -1.507 | 1.297  | -5.958 | 1.327E-06 | 4.423E-03 | 5.284 |                            |                         | 14 |                           |         |
| cg10167235 | -1.886 | -0.688 | -6.351 | 4.328E-07 | 3.180E-03 | 6.302 | WARS;WARS;WARS;WARS        | NM_173701;NM_004184;N   | 14 |                           |         |
|            |        |        |        |           |           |       |                            | M_213645;NM_213646      |    |                           |         |
| cg18125510 | -1.717 | -2.430 | -6.003 | 1.166E-06 | 4.361E-03 | 5.402 | WARS;WDR25;WARS;WARS;      | NM_004184;NM_024515;N   | 14 | chr14:100842339-100842931 | N_Shore |
|            |        |        |        |           |           |       | WDR25;WARS;WARS;WARS       | M_004184;NM_213645;NM_  |    |                           |         |
|            |        |        |        |           |           |       |                            | 001161476;NM_213646;NM_ |    |                           |         |
|            |        |        |        |           |           |       |                            | _213646;NM_173701       |    |                           |         |

|            |        |        |        |           |           |       |                       |                                                |    |                         |         |
|------------|--------|--------|--------|-----------|-----------|-------|-----------------------|------------------------------------------------|----|-------------------------|---------|
| cg18486231 | 3.282  | -0.056 | 4.706  | 4.867E-05 | 7.399E-03 | 1.991 | RNASE4;ANG;ANG;RNASE4 | NM_194431;NM_001097577<br>;NM_001145;NM_002937 | 14 | chr14:21152483-21152740 | S_Shelf |
| cg01637789 | 1.816  | -0.124 | 4.551  | 7.588E-05 | 8.092E-03 | 1.585 | THBS1                 | NM_003246                                      | 15 | chr15:39872527-39873567 | S_Shelf |
| cg03472130 | -1.777 | 1.397  | -5.619 | 3.519E-06 | 5.579E-03 | 4.395 | THSD4                 | NM_024817                                      | 15 |                         |         |
| cg04827020 | 1.678  | -0.635 | 4.572  | 7.136E-05 | 8.014E-03 | 1.641 | THBS1                 | NM_003246                                      | 15 | chr15:39872527-39873567 | S_Shelf |
| cg06272045 | -1.711 | 0.400  | -5.850 | 1.808E-06 | 4.762E-03 | 5.002 |                       |                                                | 15 |                         |         |
| cg09782560 | -1.908 | -0.188 | -5.223 | 1.100E-05 | 6.241E-03 | 3.353 |                       |                                                | 15 |                         |         |
| cg10760299 | 1.803  | -0.708 | 4.916  | 2.667E-05 | 7.010E-03 | 2.542 | GATM                  | NM_001482                                      | 15 | chr15:45669970-45671029 | N_Shore |
| cg19348484 | -1.648 | 0.680  | -4.645 | 5.803E-05 | 7.647E-03 | 1.830 | FURIN                 | NM_002569                                      | 15 | chr15:91414311-91415427 | N_Shore |
| cg19997662 | -1.805 | 3.078  | -4.840 | 3.316E-05 | 7.055E-03 | 2.343 | CHSY1                 | NM_014918                                      | 15 |                         |         |
| cg21954370 | -1.535 | 0.598  | -4.852 | 3.199E-05 | 7.011E-03 | 2.375 |                       |                                                | 15 |                         |         |
| cg22700246 | -1.801 | 0.876  | -6.152 | 7.623E-07 | 3.725E-03 | 5.788 |                       |                                                | 15 |                         |         |
| cg23387863 | -1.607 | 2.302  | -5.409 | 6.425E-06 | 6.014E-03 | 3.845 | SGK269                | NM_024776                                      | 15 |                         |         |
| cg26261358 | -4.421 | -2.626 | -4.555 | 7.505E-05 | 8.072E-03 | 1.595 |                       |                                                | 15 |                         |         |
| cg01351032 | -1.623 | 0.064  | -7.121 | 4.990E-08 | 1.413E-03 | 8.253 | CIITA                 | NM_000246                                      | 16 | chr16:10972782-10973305 | N_Shore |
| cg04599946 | -1.721 | 0.815  | -5.228 | 1.085E-05 | 6.241E-03 | 3.365 | IRF8                  | NM_002163                                      | 16 | chr16:85932121-85932942 | S_Shelf |
| cg05450979 | -3.241 | 2.805  | -4.812 | 3.597E-05 | 7.119E-03 | 2.268 | NUBP1                 | NM_002484                                      | 16 |                         |         |
| cg07839457 | -2.246 | -0.516 | -5.511 | 4.798E-06 | 5.961E-03 | 4.111 | NLRC5                 | NM_032206                                      | 16 | chr16:57023190-57023768 | N_Shore |
| cg08159663 | -1.963 | 0.500  | -5.599 | 3.720E-06 | 5.749E-03 | 4.344 | NLRC5                 | NM_032206                                      | 16 | chr16:57023190-57023768 | N_Shore |
| cg08714975 | -1.755 | 2.294  | -5.350 | 7.637E-06 | 6.153E-03 | 3.687 |                       |                                                | 16 |                         |         |
| cg08985333 | -1.530 | -0.540 | -6.768 | 1.333E-07 | 2.247E-03 | 7.368 | CIITA                 | NM_000246                                      | 16 | chr16:10972782-10973305 | N_Shore |
| cg09015246 | -2.306 | -0.131 | -7.572 | 1.446E-08 | 9.839E-04 | 9.361 | CIITA;CIITA           | NM_000246;NM_000246                            | 16 | chr16:10972782-10973305 | N_Shore |
| cg10466548 | -1.659 | -0.347 | -5.412 | 6.380E-06 | 6.014E-03 | 3.851 |                       |                                                | 16 |                         |         |
| cg26239233 | -1.893 | -0.974 | -6.426 | 3.495E-07 | 2.970E-03 | 6.496 | CIITA                 | NM_000246                                      | 16 | chr16:10972782-10973305 | N_Shore |
| cg00679763 | -1.695 | 2.867  | -5.711 | 2.696E-06 | 5.264E-03 | 4.638 | UBE2Z                 | NM_023079                                      | 17 |                         |         |
| cg01401135 | 1.513  | -0.836 | 4.830  | 3.415E-05 | 7.063E-03 | 2.316 | DNAH17                | NM_173628                                      | 17 |                         |         |
| cg01697487 | -1.610 | 0.889  | -5.277 | 9.402E-06 | 6.241E-03 | 3.496 | MYCBPAP               | NM_032133                                      | 17 | chr17:48585385-48586167 | S_Shelf |
| cg02753187 | -1.610 | 0.087  | -5.928 | 1.444E-06 | 4.472E-03 | 5.207 | CALCOCO2              | NM_005831                                      | 17 |                         |         |
| cg15601264 | -2.142 | 0.150  | -4.957 | 2.366E-05 | 6.898E-03 | 2.652 |                       |                                                | 17 |                         |         |
| cg15965301 | -1.720 | 2.393  | -5.630 | 3.400E-06 | 5.574E-03 | 4.426 |                       |                                                | 17 |                         |         |
| cg17445097 | -1.917 | 1.254  | -5.635 | 3.353E-06 | 5.535E-03 | 4.439 | PHF12;PHF12           | NM_020889;NM_001033561                         | 17 |                         |         |
| cg21463898 | 1.604  | 0.878  | 5.030  | 1.920E-05 | 6.717E-03 | 2.843 | OSBPL7                | NM_145798                                      | 17 | chr17:45890956-45891165 | N_Shelf |
| cg24166450 | -1.633 | -1.357 | -4.464 | 9.729E-05 | 8.576E-03 | 1.357 |                       |                                                | 17 |                         |         |
| cg05941652 | 1.555  | 1.826  | 5.112  | 1.514E-05 | 6.580E-03 | 3.060 | LAMA3;LAMA3           | NM_198129;NM_001127717                         | 18 | chr18:21269269-21270349 | S_Shelf |
| cg10565645 | 2.492  | 2.901  | 4.457  | 9.918E-05 | 8.624E-03 | 1.340 | GALNT1;GALNT1         | NM_020474;NM_020474                            | 18 |                         |         |
| cg00428638 | -1.667 | 1.333  | -4.302 | 1.542E-04 | 9.761E-03 | 0.936 | INSR;INSR             | NM_000208;NM_001079817                         | 19 |                         |         |
| cg01254505 | -2.421 | -2.898 | -6.675 | 1.733E-07 | 2.331E-03 | 7.131 | BST2                  | NM_004335                                      | 19 |                         |         |
| cg01329005 | -2.386 | 0.211  | -5.148 | 1.367E-05 | 6.438E-03 | 3.154 | BST2                  | NM_004335                                      | 19 |                         |         |
| cg09993699 | -1.595 | -0.393 | -5.702 | 2.764E-06 | 5.286E-03 | 4.615 | BST2                  | NM_004335                                      | 19 |                         |         |
| cg10680514 | -1.951 | -3.472 | -4.399 | 1.170E-04 | 9.034E-03 | 1.189 | LGALS13               | NM_013268                                      | 19 |                         |         |
| cg11558551 | -2.861 | -2.151 | -5.979 | 1.251E-06 | 4.396E-03 | 5.338 | BST2                  | NM_004335                                      | 19 |                         |         |
| cg12123019 | -1.672 | -0.422 | -5.712 | 2.691E-06 | 5.264E-03 | 4.640 | IL12RB1;IL12RB1       | NM_005535;NM_153701                            | 19 |                         |         |
| cg20092122 | -1.537 | 1.098  | -4.652 | 5.685E-05 | 7.608E-03 | 1.849 | BST2                  | NM_004335                                      | 19 |                         |         |
| cg22316634 | 2.246  | 2.026  | 4.555  | 7.504E-05 | 8.072E-03 | 1.595 | COMP                  | NM_000095                                      | 19 | chr19:18896515-18896860 | N_Shore |
| cg23281436 | 1.775  | -0.849 | 5.004  | 2.068E-05 | 6.756E-03 | 2.775 | KANK3                 | NM_198471                                      | 19 | chr19:8397958-8400461   | S_Shelf |
| cg24728370 | -1.841 | -2.593 | -5.868 | 1.720E-06 | 4.674E-03 | 5.048 |                       |                                                | 19 |                         |         |
| cg26588045 | -1.540 | 0.646  | -5.036 | 1.887E-05 | 6.716E-03 | 2.859 | MIA;RAB4B             | NM_006533;NM_016154                            | 19 | chr19:41283880-41284276 | N_Shore |
| cg14359894 | -2.073 | -3.757 | -5.229 | 1.080E-05 | 6.241E-03 | 3.370 | RASSF2                | NM_014737                                      | 20 | chr20:4803013-4804146   | Island  |
| cg15488794 | -2.040 | -0.906 | -6.058 | 9.961E-07 | 4.123E-03 | 5.545 | BCL2L1;BCL2L1         | NM_138578;NM_001191                            | 20 |                         |         |
| cg17343385 | 1.925  | 3.253  | 5.070  | 1.710E-05 | 6.607E-03 | 2.949 | DNAJC5                | NM_025219                                      | 20 | chr20:62550713-62551523 | S_Shore |
| cg18740175 | -1.603 | 2.407  | -5.108 | 1.531E-05 | 6.583E-03 | 3.050 | NFATC2;NFATC2;NFATC2  | NM_001136021;NM_173091<br>;NM_012340           | 20 | chr20:50108795-50109456 | S_Shore |
| cg00243527 | 4.163  | 0.622  | 5.930  | 1.438E-06 | 4.472E-03 | 5.211 | LIF                   | NM_002309                                      | 22 | chr22:30642437-30642671 | N_Shore |
| cg00539347 | -1.832 | -1.539 | -4.291 | 1.589E-04 | 9.850E-03 | 0.909 |                       |                                                | 22 |                         |         |

**Supplementary Table 3:** Summary of existing/published evidence on the functional implication of rDMR-associated genes in the intestinal epithelium. Genes were grouped into the following main categories: Development and differentiation, Intestinal epithelial immune function, Involvement in GI disease, Metabolic function. For each gene, reported function and, where applicable, modulation by environmental factors and/or relevance to disease pathogenesis is summarised.

| Gene symbol                                  | Gene name                                                           | Function in the intestinal epithelium                                                              | Modulation by epigenetic factors/ impacted by environmental factors and/or relevance for disease                                                                                                       | Reference  |
|----------------------------------------------|---------------------------------------------------------------------|----------------------------------------------------------------------------------------------------|--------------------------------------------------------------------------------------------------------------------------------------------------------------------------------------------------------|------------|
| <b>Development and differentiation</b>       |                                                                     |                                                                                                    |                                                                                                                                                                                                        |            |
| KCNQ1                                        | potassium voltage-gated Channel, KQT-like subfamily, member 1       | Voltage-gated potassium channel                                                                    | Tissue-specific imprinting, role in GI cancer                                                                                                                                                          | 1, 2       |
| LFNG                                         | LFNG O-fucosyl-peptide 3-beta-N-acetylglucosaminyltransferase       | Notch signaling involvement                                                                        | Differentially regulated in the mouse intestinal epithelium with development                                                                                                                           | 3          |
| SFRP                                         | secreted frizzled-related protein1                                  | Wnt modulator. Dynamically expressed, controls apicobasal polarity in the developing gut           |                                                                                                                                                                                                        | 4, 5       |
| SPDEF                                        | SAM pointed domain containing ETS transcription factor              | Transcription Factor, Tumor suppressor, Wnt inhibitor                                              | Functions as a colorectal tumor suppressor by inhibiting $\beta$ -catenin activity.                                                                                                                    | 6          |
| TCF7L1                                       | transcription factor 7-like 1                                       | Intestinal homeostatic self-renewal, Wnt signaling                                                 |                                                                                                                                                                                                        | 7, 8       |
| TET1                                         | tet methylcytosine dioxygenase 1                                    | Regulation of cell lineage commitment. Erasure of genomic imprinting                               | Modulated by Vitamin C                                                                                                                                                                                 | 9-11,12    |
| WIF1                                         | WNT inhibitory factor 1                                             | Tumor suppressor gene, negative Wnt regulator                                                      | Increased with maternal vitamin B supplementation. Methylation as marker for colorectal cancer                                                                                                         | 13,14,15   |
| ZFP42                                        | zinc finger protein 42                                              | Pluripotency marker                                                                                | Rex1/Zfp42 as an epigenetic regulator for genomic imprinting. Potential role in preimplantation development                                                                                            | 16, 17,    |
| <b>Intestinal epithelial immune function</b> |                                                                     |                                                                                                    |                                                                                                                                                                                                        |            |
| BIRC3                                        | baculoviral IAP repeat containing 3                                 | Regulator of innate immune signaling, antiapoptotic                                                | Upregulated in Caco-2 cell by <i>L. salivarius</i> . Upregulation in regenerating colonocytes in UC. May be regulated by DNA methylation                                                               | 18, 19, 20 |
| IL32                                         | interleukin 32                                                      | Cytokine signaling                                                                                 | Induced by Toll-like receptor agonists. Stimulated by butyrate. Overexpressed in IBD                                                                                                                   | 21, 22, 23 |
| ITLN1                                        | intelectin 1                                                        | Expression in enterocytes and goblet cells. Intestinal homeostasis by protecting against apoptosis |                                                                                                                                                                                                        | 24, 25     |
| LGALS9                                       | lectin, galactoside-binding, soluble, 9                             | Modulator of cell-cell and cell-matrix interactions                                                | Involved in immunomodulating effects of nondigestible oligosaccharides                                                                                                                                 | 26, 27     |
| MUC2                                         | mucin 2                                                             | Mucus layer, antimicrobial defense                                                                 | Epigenetic regulation by DNA methylation in colorectal and pancreatic cancer. Gene transcription influenced by type of bacterial colonization in neonatal mice. Depletion in necrotizing enterocolitis | 28, 29-34  |
| OAS1, OAS2                                   | 2'-5'-oligoadenylate synthetase                                     | Involvement in innate immune response                                                              | Inverse correlation between promoter methylation and expression level in glioblastomas, Diagnostic biomarker for systemic lupus erythematosus                                                          | 34, 35, 36 |
| PTGER4                                       | prostaglandin E receptor 4                                          | PGE2 signaling, T-cell factor signaling                                                            | Gastric colonisation with restricted commensal microbiota replicates the promotion of neoplastic lesions. Risk variant affecting PTGER4 for CD                                                         | 37, 38     |
| PIGR                                         | polymeric immunoglobulin receptor                                   | Transepithelial IgA transport                                                                      | altered DNA methylation in Barrett's oesophagus and Plasmodium infection (liver)                                                                                                                       | 39, 40     |
| TFF3                                         | trefoil-factor 3                                                    | Mucosal layer protection                                                                           | UC-associated TLR2-R753Q variant leads to TFF3 deficiency. Epigenetic control in human retinoblastoma cell lines                                                                                       | 41, 42     |
| TLR3, TLR4                                   | toll-like receptor 3, toll-like receptor 4                          | Pattern recognition receptor                                                                       | Gut flora required for the control of intestinal infection by poly (I:C) administration in neonates. Microbial cell components induce tolerance to flagellin-stimulated inflammation                   | 43, 44     |
|                                              |                                                                     |                                                                                                    | TLR4 signaling reduced by amniotic fluid. Partially repressed by DNA methylation in cell lines.                                                                                                        | 45, 46     |
| HLA-C, HLA-DMA, HLA-DMB, HLA-DRA             | major histocompatibility complex, class II                          | Antigen presentation in epithelial cells                                                           | HLA-DRA bound by histone methyl and acetyltransferase complex components. HLA-DRA is protected against epigenetic silencing by DNA methylation by RFX                                                  | 47, 48, 49 |
| <b>Involvement in GI disease</b>             |                                                                     |                                                                                                    |                                                                                                                                                                                                        |            |
| BNIP3                                        | BCL2/adenovirus E1B 19kDa interacting protein 3                     | Mediator of cell survival                                                                          | Epigenetic silencing in control of expression in human colorectal cancer cells                                                                                                                         | 50         |
| CCL28                                        | chemokine (C-C motif) Ligand 28                                     | Mucosal tissue protection, antibacterial                                                           | Increased expression in ileal crohns disease                                                                                                                                                           | 51, 52     |
| HOXC6                                        | homeobox C6                                                         | Tumor suppressor gene                                                                              | Predictive significance in esophageal squamous cell carcinoma. Upregulation associated with poor gastric cancer survival. Inactivated by methylation and somatic mutations in head and neck cancer     | 53, 54, 55 |
| DUOX2                                        | dual oxidase 2                                                      | Generation of hydrogen peroxide                                                                    | Induction by gut microbiota, increased expression in paediatric CD associated with Proteobacteria                                                                                                      | 56, 57     |
| MICB                                         | MHC class I polypeptide-related sequence B                          | Mediation of enterocyte apoptosis                                                                  | Tumor-associated expression, linked to stress and Coeliac Disease. Linked to UC in Chinese population                                                                                                  | 58-60      |
| OLFM4                                        | olfactomedin-4                                                      | Cell adhesion, growth,self-renewal                                                                 | Secreted into mucus in active IBD                                                                                                                                                                      | 61         |
| PRPH                                         | peripherin                                                          | Cytoskeletal protein                                                                               | Tumor suppressor gene in hepatocellular carcinoma                                                                                                                                                      | 62         |
| REG1A                                        | regenerating gene 1A                                                | Antimicrobial defense                                                                              | Epigenetic regulation of REG1A in cutaneous melanoma. Altered expression in UC mucosa, returned to normal in remission                                                                                 | 63, 64     |
| SELENBP1                                     | selenium-binding protein 1                                          | role in protein degradation (likely)                                                               | Modulated by epigenetic mechanisms in colorectal cancer. Altered protein level in Ulcerative Colitis                                                                                                   | 65, 66, 67 |
| SFRP                                         | secreted frizzled-related protein1                                  | Modulator of Wnt signaling                                                                         | Frequent epigenetic inactivation of SFRP genes in gastric cancer, expression leads to antitumor synergy of HDAC and methyltransferase inhibitors in chemoresistant cancers                             | 68, 69     |
| TAP1, TAP2                                   | transporter 1 and 2 of ATP-binding cassette, sub-family B (MDR/TAP) | Antigen presentation                                                                               | TAP polymorphism in inflammatory bowel diseases. Downregulation linked to a loss of inflammatory response in colorectal cancer                                                                         | 70, 70     |
| UBD                                          | ubiquitin D                                                         | Protein modification                                                                               | Selectively expressed in the follicle-associated epithelium. Proteins modified by UBD are involved in NF- $\kappa$ B activation. Epigenetic marker for liver preneoplasia in a mouse model             | 71, 72, 73 |
| XAF1                                         | XIAP associated factor 1                                            | Regulation of apoptosis                                                                            | Alteration in human CRC and gastric cancer. Correlation between CpG methylation and silencing                                                                                                          | 74-76      |

| Metabolic Function |                                                                  |                                    |                                           |        |
|--------------------|------------------------------------------------------------------|------------------------------------|-------------------------------------------|--------|
| <b>NPC1L1</b>      | Niemann-Pick C1-like 1                                           | Cholesterol absorption             | Epigenetic modulation by DNA methylation  | 77     |
| <b>SLC5A1</b>      | solute carrier family 5 (sodium/glucose cotransporter), member 1 | Sodium-dependent glucose transport | Dietary and nutrient-dependent regulation | 78, 79 |
| <b>SLC9A2</b>      | solute carrier family 9 (sodium/hydrogen exchanger), member 2    | Sodium/hydrogen exchanger          | Regulation by butyrate in rat ileum       | 80     |

Supplementary Table 2 References

1. Than BLN, Goos JACM, Sarver AL, et al. The role of KCNQ1 in mouse and human gastrointestinal cancers. *Oncogene* 2014;33:3861-8.
2. Rapetti-Mauss R, O'Mahony F, Sepulveda FV, et al. Oestrogen promotes KCNQ1 potassium channel endocytosis and postendocytic trafficking in colonic epithelium. *The Journal of physiology* 2013;591:2813-31.
3. Schröder N, Gossler A. Expression of Notch pathway components in fetal and adult mouse small intestine. *Gene expression patterns : GEP* 2002;2:247-50.
4. Matsuyama M, Aizawa S, Shimono A. Sfrp controls apicobasal polarity and oriented cell division in developing gut epithelium. *PLoS genetics* 2009;5:e1000427-e1000427.
5. Pézeron G, Anselme I, Laplante M, et al. Duplicate sfrp1 genes in zebrafish: sfrp1a is dynamically expressed in the developing central nervous system, gut and lateral line. *Gene expression patterns : GEP* 2006;6:835-42.
6. Noah TK, Lo Y-H, Price A, et al. SPDEF functions as a colorectal tumor suppressor by inhibiting  $\beta$ -catenin activity. *Gastroenterology* 2013;144:1012-1023.e6.
7. van Es JH, Haegerbarth A, Kujala P, et al. A critical role for the Wnt effector Tcf4 in adult intestinal homeostatic self-renewal. *Molecular and cellular biology* 2012;32:1918-27.
8. Shy BR, Wu C-I, Khramtsova GF, et al. Regulation of Tcf7l1 DNA binding and protein stability as principal mechanisms of Wnt/ $\beta$ -catenin signaling. *Cell reports* 2013;4:1-9.
9. Blaschke K, Ebata KT, Karimi MM, et al. Vitamin C induces Tet-dependent DNA demethylation and a blastocyst-like state in ES cells. *Nature* 2013;500:222-6.
10. Lee K, Hamm J, Whitworth K, et al. Dynamics of TET family expression in porcine preimplantation embryos is related to zygotic genome activation and required for the maintenance of NANOG. *Developmental biology* 2014;386:86-95.
11. Yamaguchi S, Shen L, Liu Y, et al. Role of Tet1 in erasure of genomic imprinting. *Nature* 2013;504:460-4.
12. Ficiz G, Branco MR, Seisenberger S, et al. Dynamic regulation of 5-hydroxymethylcytosine in mouse ES cells and during differentiation. *Nature* 2011;473:398-402.
13. Roperch J-P, Incitti R, Forbin S, et al. Aberrant methylation of NPY, PENK, and WIF1 as a promising marker for blood-based diagnosis of colorectal cancer. *BMC cancer* 2013;13:566-566.
14. Amiot A, Mansour H, Baumgaertner I, et al. The detection of the methylated Wif-1 gene is more accurate than a fecal occult blood test for colorectal cancer screening. *PLoS one* 2014;9:e99233-e99233.
15. Ciappio ED, Liu Z, Brooks RS, et al. Maternal B vitamin supplementation from preconception through weaning suppresses intestinal tumorigenesis in Apc1638N mouse offspring. *Gut* 2011;60:1695-702.
16. Kim JD, Kim H, Ekram MB, et al. Rex1/Zfp42 as an epigenetic regulator for genomic imprinting. *Hum Mol Genet* 2011;20:1353-62.
17. Climent M, Alonso-Martin S, Perez-Palacios R, et al. Functional analysis of Rex1 during preimplantation development. *Stem Cells Dev* 2013;22:459-72.
18. O'Callaghan J, Buttó LF, MacSharry J, et al. Influence of adhesion and bacteriocin production by *Lactobacillus salivarius* on the intestinal epithelial cell transcriptional response. *Applied and environmental microbiology* 2012;78:5196-203.
19. Seidelin JB, Vainer B, Andresen L, et al. Upregulation of clAP2 in regenerating colonocytes in ulcerative colitis. *Virchows Archiv : an international journal of pathology* 2007;451:1031-8.
20. Puto LA, Reed JC. Daxx represses RelB target promoters via DNA methyltransferase recruitment and DNA hypermethylation. *Genes & development* 2008;22:998-1010.
21. Li W, Sun W, Liu L, et al. IL-32: a host proinflammatory factor against influenza viral replication is upregulated by aberrant epigenetic modifications during influenza A virus infection. *Journal of immunology (Baltimore, Md. : 1950)* 2010;185:5056-65.
22. Kobori A, Bamba S, Imaeda H, et al. Butyrate stimulates IL-32alpha expression in human intestinal epithelial cell lines. *World journal of gastroenterology : WJG* 2010;16:2355-61.
23. Shioya M, Nishida A, Yagi Y, et al. Epithelial overexpression of interleukin-32alpha in inflammatory bowel disease. *Clinical and experimental immunology* 2007;149:480-6.
24. Wrackmeyer U, Hansen GH, Seya T, et al. Intelectin: a novel lipid raft-associated protein in the enterocyte brush border. *Biochemistry* 2006;45:9188-97.
25. Washimi K, Yokose T, Yamashita M, et al. Specific expression of human intelectin-1 in malignant pleural mesothelioma and gastrointestinal goblet cells. *PLoS one* 2012;7:e39889-e39889.
26. de Kivit S, Saeland E, Kraneveld AD, et al. Galectin-9 induced by dietary synbiotics is involved in suppression of allergic symptoms in mice and humans. *Allergy* 2012;67:343-52.
27. de Kivit S, Kraneveld AD, Knippels LMJ, et al. Intestinal epithelium-derived galectin-9 is involved in the immunomodulating effects of nondigestible oligosaccharides. *Journal of innate immunity* 2013;5:625-38.
28. Siedow A, Szyf M, Gratchev A, et al. De novo expression of the Muc2 gene in pancreas carcinoma cells is triggered by promoter demethylation. *Tumour biology : the journal of the International Society for Oncodevelopmental Biology and Medicine*;23:54-60.
29. Hanski C, Riede E, Gratchev A, et al. MUC2 gene suppression in human colorectal carcinomas and their metastases: in vitro evidence of the modulatory role of DNA methylation. *Laboratory investigation; a journal of technical methods and pathology* 1997;77:685-95.
30. Gratchev A, Siedow A, Bumke-Vogt C, et al. Regulation of the intestinal mucin MUC2 gene expression in vivo: evidence for the role of promoter methylation. *Cancer letters* 2001;168:71-80.
31. Mesquita P. Role of site-specific promoter hypomethylation in aberrant MUC2 mucin expression in mucinous gastric carcinomas. *Cancer Letters* 2003;189:129-136.
32. Yamada N, Hamada T, Goto M, et al. MUC2 expression is regulated by histone H3 modification and DNA methylation in pancreatic cancer. *International journal of cancer. Journal international du cancer* 2006;119:1850-7.
33. Vincent A, Perrais M, Desseyn JL, et al. Epigenetic regulation (DNA methylation, histone modifications) of the 11p15 mucin genes (MUC2, MUC5AC, MUC5B, MUC6) in epithelial cancer cells. *Oncogene* 2007;26:6566-76.
34. Okudaira K, Kakar S, Cun L, et al. MUC2 gene promoter methylation in mucinous and non-mucinous colorectal cancer tissues. *International journal of oncology* 2010;36:765-75.
35. Etcheverry A, Aubry M, de Tayrac M, et al. DNA methylation in glioblastoma: impact on gene expression and clinical outcome. *BMC genomics* 2010;11:701-701.

36. Feng X, Huang J, Liu Y, et al. Identification of interferon-inducible genes as diagnostic biomarker for systemic lupus erythematosus. *Clinical rheumatology* 2014.
37. Glas J, Seiderer J, Czamara D, et al. PTGER4 expression-modulating polymorphisms in the 5p13.1 region predispose to Crohn's disease and affect NF- $\kappa$ B and XBP1 binding sites. *PLoS one* 2012;7:e52873-e52873.
38. Lertpiriyapong K, Whary MT, Muthupalani S, et al. Gastric colonisation with a restricted commensal microbiota replicates the promotion of neoplastic lesions by diverse intestinal microbiota in the *Helicobacter pylori* INS-GAS mouse model of gastric carcinogenesis. *Gut* 2014;63:54-63.
39. Alvi MA, Liu X, O'Donovan M, et al. DNA methylation as an adjunct to histopathology to detect prevalent, inconspicuous dysplasia and early-stage neoplasia in Barrett's esophagus. *Clinical cancer research : an official journal of the American Association for Cancer Research* 2013;19:878-88.
40. Al-Quraishy S, Dkhil MA, Abdel-Baki AAS, et al. Genome-wide screening identifies *Plasmodium chabaudi*-induced modifications of DNA methylation status of Tlr1 and Tlr6 gene promoters in liver, but not spleen, of female C57BL/6 mice. *Parasitology research* 2013;112:3757-70.
41. Podolsky DK, Gerken G, Eyring A, et al. Colitis-associated variant of TLR2 causes impaired mucosal repair because of TFF3 deficiency. *Gastroenterology* 2009;137:209-20.
42. Philippeit C, Busch M, Dünker N. Epigenetic control of trefoil factor family (TFF) peptide expression in human retinoblastoma cell lines. *Cellular physiology and biochemistry : international journal of experimental cellular physiology, biochemistry, and pharmacology* 2014;34:1001-14.
43. Lacroix-Lamandé S, Guesdon W, Drouet F, et al. The gut flora is required for the control of intestinal infection by poly(I:C) administration in neonates. *Gut microbes* 2014;5:533-40.
44. Li N, Quidley MC, Kobeissy FH, et al. Microbial cell components induced tolerance to flagellin-stimulated inflammation through Toll-like receptor pathways in intestinal epithelial cells. *Cytokine* 2012;60:806-11.
45. Takahashi K, Sugi Y, Hosono A, et al. Epigenetic regulation of TLR4 gene expression in intestinal epithelial cells for the maintenance of intestinal homeostasis. *Journal of immunology (Baltimore, Md. : 1950)* 2009;183:6522-9.
46. Good M, Siggers RH, Sodhi CP, et al. Amniotic fluid inhibits Toll-like receptor 4 signaling in the fetal and neonatal intestinal epithelium. *Proceedings of the National Academy of Sciences of the United States of America* 2012;109:11330-5.
47. Byrne B, Madrigal-Estebas L, McEvoy A, et al. Human duodenal epithelial cells constitutively express molecular components of antigen presentation but not costimulatory molecules. *Human immunology* 2002;63:977-86.
48. Hershberg RM, Cho DH, Youakim A, et al. Highly polarized HLA class II antigen processing and presentation by human intestinal epithelial cells. *The Journal of clinical investigation* 1998;102:792-803.
49. Seguin-Estévez Q, De Palma R, Krawczyk M, et al. The transcription factor RFX protects MHC class II genes against epigenetic silencing by DNA methylation. *Journal of immunology (Baltimore, Md. : 1950)* 2009;183:2545-53.
50. Swiderek E, Kalas W, Wysokinska E, et al. The interplay between epigenetic silencing, oncogenic KRas and HIF-1 regulatory pathways in control of BNIP3 expression in human colorectal cancer cells. *Biochemical and biophysical research communications* 2013;441:707-12.
51. Hieshima K, Ohtani H, Shibano M, et al. CCL28 has dual roles in mucosal immunity as a chemokine with broad-spectrum antimicrobial activity. *Journal of immunology (Baltimore, Md. : 1950)* 2003;170:1452-61.
52. Berri M, Virlogeux-Payant I, Chevaleyre C, et al. CCL28 involvement in mucosal tissues protection as a chemokine and as an antibacterial peptide. *Developmental and comparative immunology* 2014;44:286-90.
53. Du Y-B, Dong B, Shen L-Y, et al. The survival predictive significance of HOXC6 and HOXC8 in esophageal squamous cell carcinoma. *The Journal of surgical research* 2014;188:442-50.
54. Zhang Q, Jin XS, Yang ZY, et al. Upregulated Hoxc6 expression is associated with poor survival in gastric cancer patients. *Neoplasia* 2013;60:439-45.
55. Guerrero-Preston R, Michailidi C, Marchionni L, et al. Key tumor suppressor genes inactivated by "greater promoter" methylation and somatic mutations in head and neck cancer. *Epigenetics : official journal of the DNA Methylation Society* 2014;9:1031-46.
56. Haberman Y, Tickle TL, Dexheimer PJ, et al. Pediatric Crohn disease patients exhibit specific ileal transcriptome and microbiome signature. *The Journal of clinical investigation* 2014;124:3617-33.
57. Sommer F, Bäckhed F. The gut microbiota engages different signaling pathways to induce Duox2 expression in the ileum and colon epithelium. *Mucosal immunology* 2014.
58. Groh V, Rhinehart R, Secrist H, et al. Broad tumor-associated expression and recognition by tumor-derived gamma delta T cells of MICA and MICB. *Proceedings of the National Academy of Sciences of the United States of America* 1999;96:6879-84.
59. Lü M, Xia B, Li J, et al. MICB microsatellite polymorphism is associated with ulcerative colitis in Chinese population. *Clinical immunology (Orlando, Fla.)* 2006;120:199-204.
60. Allegretti YL, Bondar C, Guzman L, et al. Broad MICA/B expression in the small bowel mucosa: a link between cellular stress and celiac disease. *PLoS one* 2013;8:e73658-e73658.
61. Gersemann M, Becker S, Nuding S, et al. Olfactomedin-4 is a glycoprotein secreted into mucus in active IBD. *J Crohns Colitis* 2012;6:425-34.
62. Revill K, Wang T, Lachenmayer A, et al. Genome-wide methylation analysis and epigenetic unmasking identify tumor suppressor genes in hepatocellular carcinoma. *Gastroenterology* 2013;145:1424-35.e1-25.
63. Sato Y, Marzese DM, Ohta K, et al. Epigenetic regulation of REG1A and chemosensitivity of cutaneous melanoma. *Epigenetics : official journal of the DNA Methylation Society* 2013;8:1043-52.
64. Planell N, Lozano JJ, Mora-Buch R, et al. Transcriptional analysis of the intestinal mucosa of patients with ulcerative colitis in remission reveals lasting epithelial cell alterations. *Gut* 2013;62:967-76.
65. Silvers AL, Lin L, Bass AJ, et al. Decreased selenium-binding protein 1 in esophageal adenocarcinoma results from posttranscriptional and epigenetic regulation and affects chemosensitivity. *Clinical cancer research : an official journal of the American Association for Cancer Research* 2010;16:2009-21.
66. Wang N, Chen Y, Yang X, et al. Selenium-binding protein 1 is associated with the degree of colorectal cancer differentiation and is regulated by histone modification. *Oncology reports* 2014;31:2506-14.
67. Hsieh S-Y, Shih T-C, Yeh C-Y, et al. Comparative proteomic studies on the pathogenesis of human ulcerative colitis. *Proteomics* 2006;6:5322-31.
68. Nojima M, Suzuki H, Toyota M, et al. Frequent epigenetic inactivation of SFRP genes and constitutive activation of Wnt signaling in gastric cancer. *Oncogene* 2007;26:4699-713.
69. Cooper SJ, von Roemeling CA, Kang KH, et al. Reexpression of tumor suppressor, sFRP1, leads to antitumor synergy of combined HDAC and methyltransferase inhibitors in chemoresistant cancers. *Molecular cancer therapeutics* 2012;11:2105-15.
70. Heresbach D, Alizadeh M, Bretagne JF, et al. TAP gene transporter polymorphism in inflammatory bowel diseases. *Scandinavian journal of gastroenterology* 1997;32:1022-7.
71. Kobayashi A, Donaldson DS, Kanaya T, et al. Identification of novel genes selectively expressed in the follicle-associated epithelium from the meta-analysis of transcriptomics data from multiple mouse cell and tissue populations. *DNA Res* 2012;19:407-22.
72. Oliva J, Bardag-Gorce F, French BA, et al. Fat10 is an epigenetic marker for liver preneoplasia in a drug-primed mouse model of tumorigenesis. *Experimental and molecular pathology* 2008;84:102-12.
73. Buchsbaum S, Bercovich B, Ziv T, et al. Modification of the inflammatory mediator LRRFIP2 by the ubiquitin-like protein FAT10 inhibits its activity during cellular response to LPS. *Biochemical and biophysical research communications* 2012;428:11-6.
74. Byun D-S, Cho K, Ryu B-K, et al. Hypermethylation of XIAP-associated factor 1, a putative tumor suppressor gene from the 17p13.2 locus, in human gastric adenocarcinomas. *Cancer research* 2003;63:7068-75.
75. Zou B, Chim CS, Zeng H, et al. Correlation between the single-site CpG methylation and expression silencing of the XAF1 gene in human gastric and colon cancers. *Gastroenterology* 2006;131:1835-43.



76. Chung S-K, Lee M-G, Ryu B-K, et al. Frequent alteration of XAF1 in human colorectal cancers: implication for tumor cell resistance to apoptotic stresses. *Gastroenterology* 2007;132:2459-77.
77. Malhotra P, Soni V, Kumar A, et al. Epigenetic modulation of intestinal cholesterol transporter Niemann-Pick C1-like 1 (NPC1L1) gene expression by DNA methylation. *The Journal of biological chemistry* 2014;289:23132-40.
78. Dyer J, Hosie KB, Shirazi-Beechey SP. Nutrient regulation of human intestinal sugar transporter (SGLT1) expression. *Gut* 1997;41:56-9.
79. Wiśniewski JR, Friedrich A, Keller T, et al. The Impact of High Fat Diet on Metabolism and Immune Defense in Small Intestine Mucosa. *Journal of proteome research* 2014.
80. Subramanya SB, Rajendran VM, Srinivasan P, et al. Differential regulation of cholera toxin-inhibited Na-H exchange isoforms by butyrate in rat ileum. *American journal of physiology. Gastrointestinal and liver physiology* 2007;293:G857-63.

## Supplementary Figures

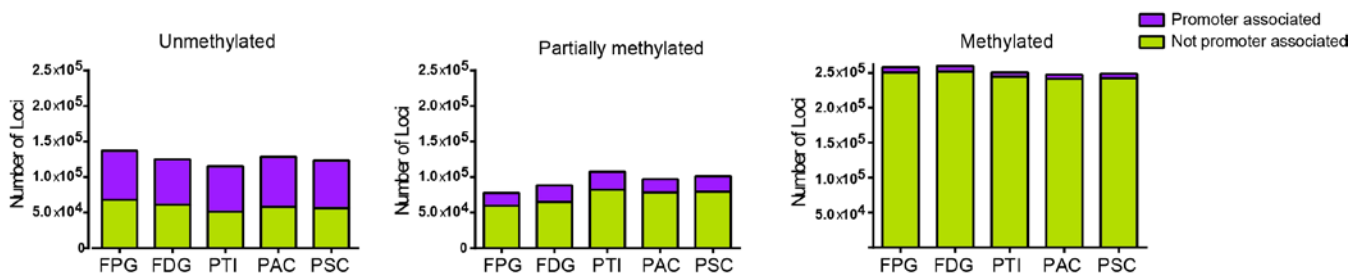

### Supplementary Figure 1

Genome-wide DNA methylation pattern of purified intestinal foetal and paediatric epithelial cells analysed by 450K array. Number of promoter-associated loci stratified according to their DNA methylation status (unmethylated, partially methylated and methylated). Shown is the average number of loci per sample in each sample group. Overall, unmethylated probes were more frequently found to be associated with gene promoter regions compared to partially methylated probes. In contrast, the majority of fully methylated probes were not associated with promoter regions. This distribution pattern did not vary significantly between individual samples. Abbreviations: FPG= Foetal proximal gut, FDG= Foetal distal gut, PTI= Paediatric terminal ileum, PAC= Paediatric ascending colon, PSC= Paediatric sigmoid colon. n=3 (foetal) and 2 (paediatric).

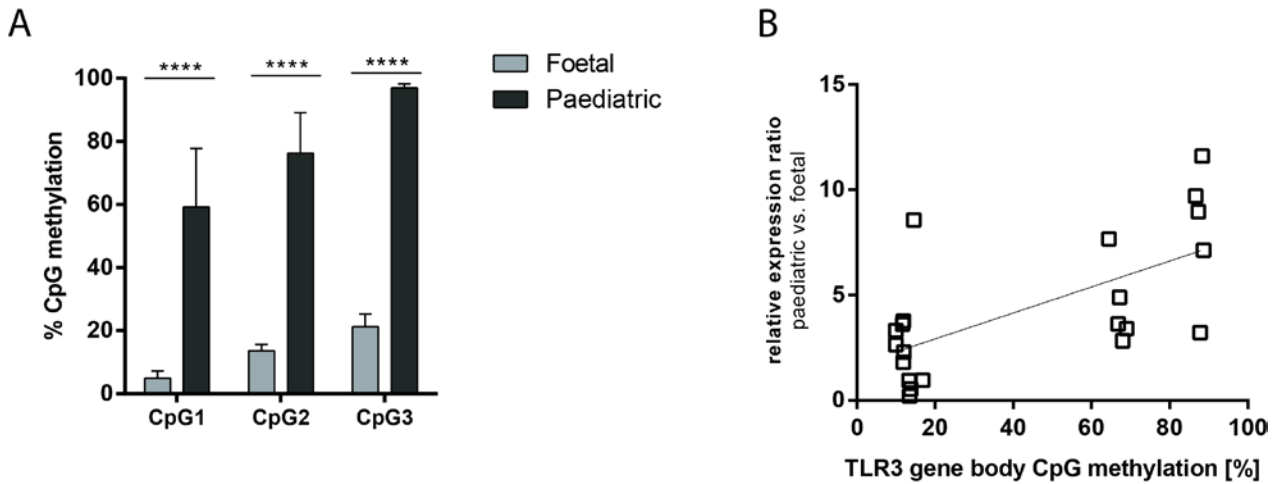

**Supplementary Figure 2:**

(A) DNA methylation profile of 3 CpGs located in the 3rd intron of the TLR3 gene was assessed in foetal and paediatric intestinal epithelium assessed using pyrosequencing on bisulfite converted DNA. In contrast to the upstream promoter regions, this intragenic region was found to be significantly hypermethylated in paediatric compared to foetal intestinal epithelium. Two-way analysis of variance, post-test: Sidak, \*\*\*\* $p < 0.0001$ ,  $n = 12-16$ , measured in duplicate. (B) A positive correlation of intragenic DNA methylation with TLR3 mRNA expression was observed.

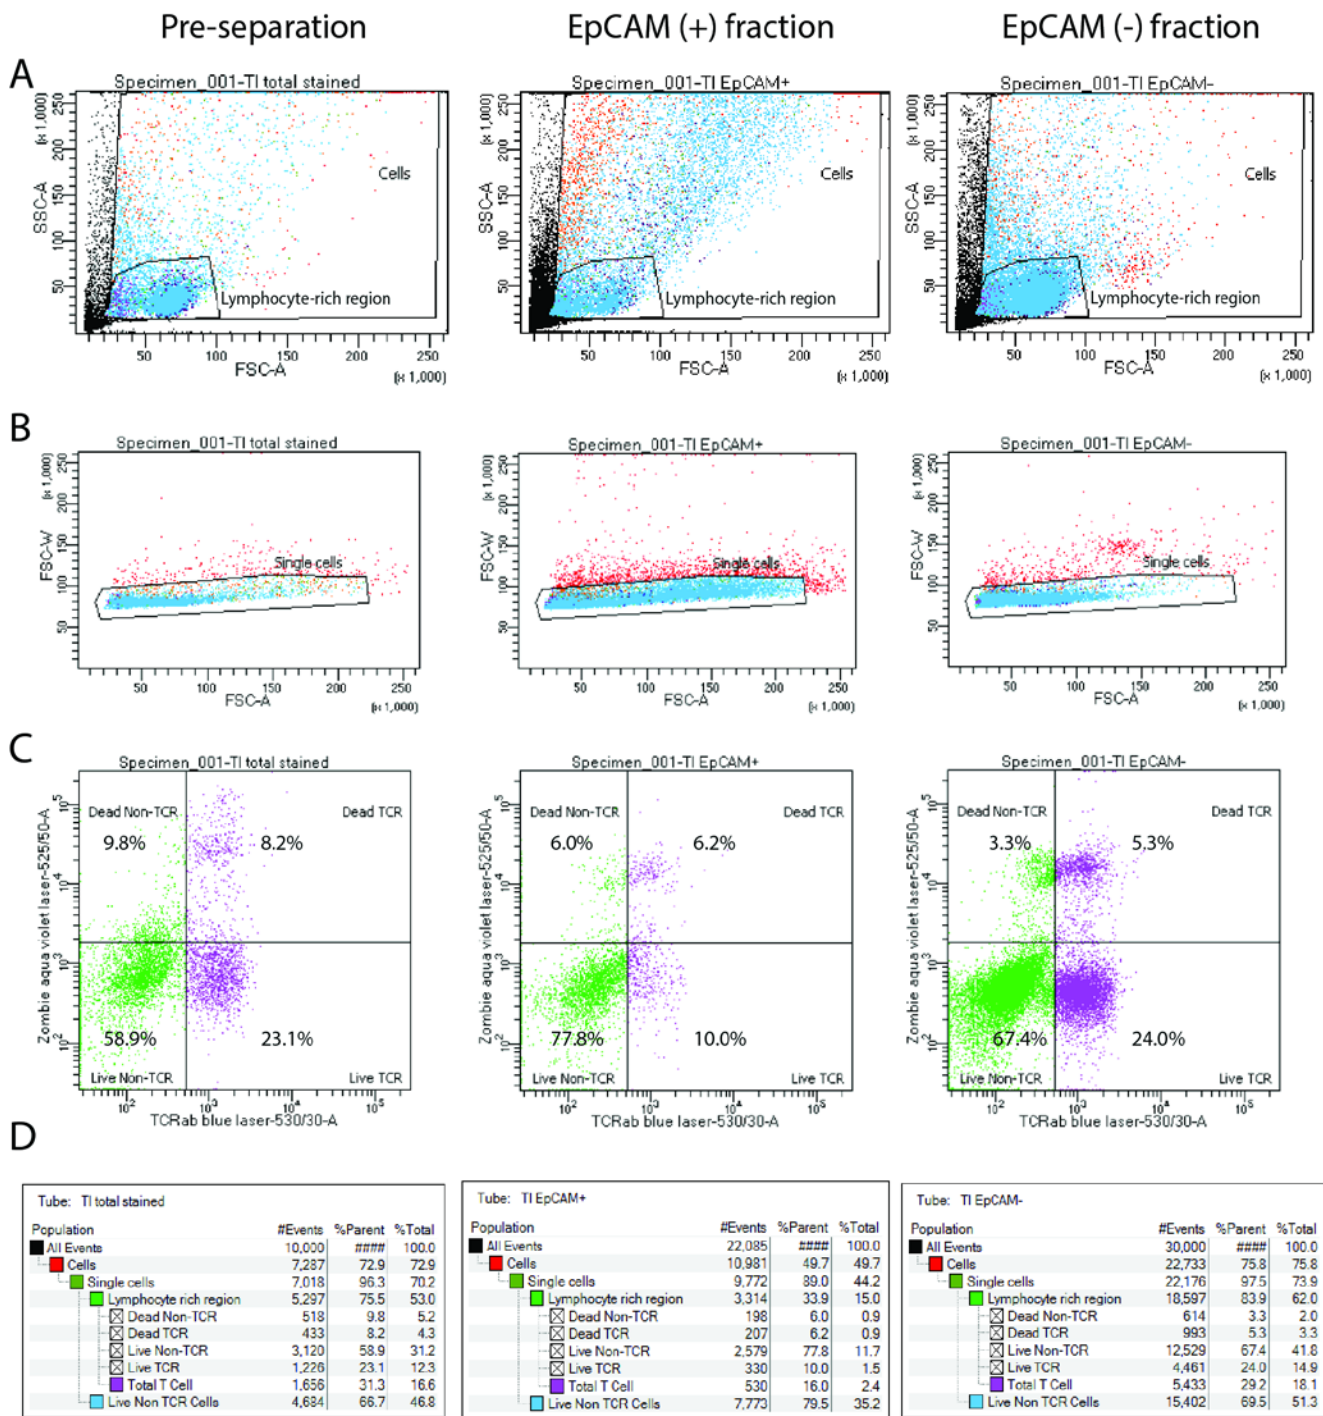

Supplementary Figure 3

Estimation of T-cell contamination pre- and post- magnetic bead sorting (MACS) assessed by flow cytometry. (A) Forward- and side scatterplots of cells prior to MACS-separation (left) and post-separation; EpCAM-positive fraction (centre; containing purified intestinal epithelium) and EpCAM-negative fraction (right). Displayed are all events with indicated gating for total cellular population and the population containing the highest lymphocyte proportion (lymphocyte-rich region) (B) Gatings for single cells in each fraction, based on forward scatter. (C) Fluorescent intensity scatters within lymphocyte-rich region for T-cell receptor (TCR) and live-dead cell staining (Zombie Aqua) in each fraction. Percentages of cells in each quadrant as a proportion of total cells within lymphocyte-rich region are indicated. (D) Gating hierarchy summarising number of events within each gate and the respective percentage of total events. (E) Estimation of T-cell contamination by calculating proportion of T-cells within lymphocyte-rich region as well as proportion of cells and total events. Proportion of T-cells within EPCAM (+) fraction estimated to be <5%. Displayed data are representative of regularly performed T -cell contamination testing.
